## **S-acylation targets ORAI1 channels to lipid rafts for efficient Ca<sup>2+</sup> signaling by**

### **T cell receptors at the immune synapse**

Amado Carreras-Sureda<sup>1</sup>, Laurence Abrami<sup>2</sup>, Ji-Hee Kim<sup>3</sup>, Maud Frieden<sup>1</sup>, Monica Didier<sup>1</sup>, F. Gisou Van der Goot<sup>2</sup>, Nicolas Demaurex<sup>1</sup>

<sup>1</sup>Department of Cell Physiology and Metabolism, University of Geneva, Geneva, 1211, Switzerland.

<sup>2</sup>Faculty of Life Sciences, Global Health Institute, EPFL, 1015 Lausanne, Switzerland.

<sup>3</sup>Department of Physiology, Yonsei University Wonju College of Medicine, Wonju, Gangwon-Do 26426, Republic of Korea

Corresponding Author:

Nicolas Demaurex

Department of Cell Physiology and Metabolism,

Rue Michel-Servet, 1

University of Geneva,

Switzerland.

1 **Abstract**

2           Efficient immune responses require Ca<sup>2+</sup> fluxes across ORAI1 channels during engagement of  
3 T cell receptors (TCR) at the immune synapse (IS) between T cells and antigen presenting cells. Here,  
4 we show that ZDHHC20-mediated S-acylation of the ORAI1 channel at residue Cys143 is required for  
5 TCR assembly and signaling at the IS. Cys143 mutations reduced ORAI1 currents and store-operated  
6 Ca<sup>2+</sup> entry in HEK-293 cells and nearly abrogated long-lasting Ca<sup>2+</sup> elevations, NFATC1 translocation,  
7 and IL-2 secretion evoked by TCR engagement in Jurkat T cells. The acylation-deficient channel had  
8 reduced mobility in lipids, accumulated in cholesterol-poor domains, formed tiny clusters, failed to  
9 reach the IS and unexpectedly also prevented TCR recruitment to the IS. Our results establish S-  
10 acylation as a critical regulator of ORAI1 channel assembly and function at the IS and reveal that local  
11 Ca<sup>2+</sup> fluxes are required for TCR recruitment to the synapse.

12

## 13 Introduction

14 The development of an efficient immune responses by T lymphocytes require long-lasting  $\text{Ca}^{2+}$   
15 elevations mediated by the plasma membrane (PM) channel ORAI1 during engagement of T cell  
16 receptors (TCR) at the immune synapse (IS) forming between T cells and antigen-presenting cells.  
17 Following TCR engagement, the  $\text{Ca}^{2+}$  depletion of the endoplasmic reticulum (ER) causes the ER-bound  
18  $\text{Ca}^{2+}$  sensors STIM1-2 to oligomerize and to accumulate in ER-PM junctions, where they trap and gate  
19 the  $\text{Ca}^{2+}$ -release-activated (CRAC) ORAI1 channel. The ensuing  $\text{Ca}^{2+}$  influx sustains long-lasting  $\text{Ca}^{2+}$   
20 signals that initiate gene expression programs of T cell proliferation and differentiation. Proper ORAI1  
21 function is essential for immunity in humans and patients with ORAI1 mutations suffer from severe  
22 combined immunodeficiency <sup>1</sup>. Recent studies have revealed the structural rearrangements occurring  
23 within ORAI1 as STIM1 binding opens the channel pore and increases its selectivity for  $\text{Ca}^{2+}$  <sup>2, 3</sup>,  
24 reviewed in <sup>4</sup>. Crystal structure from the highly homologous *Drosophila* Orai1 channel revealed a  
25 hexamer of four concentric TM subunits, with pore-lining TM1 helices bearing an acidic selectivity  
26 filter followed by hydrophobic and basic regions <sup>5, 6</sup>. The closed structure is stabilized by multiple  
27 interactions between interlocking TM2 and TM3 helices and peripheral TM4 helices, bent in three  
28 crossed helical pairs extending in the cytosol. STIM1 binds to the external M4 helix, generating a gating  
29 signal transmitted by the TM2/TM3 ring to TM1, opening the channel pore and increasing its  $\text{Ca}^{2+}$   
30 selectivity. The reversible switch of ORAI1 between a quiescent to an active state is highly regulated  
31 to avoid inappropriate  $\text{Ca}^{2+}$  fluxes at the wrong time or place (reviewed in <sup>4</sup>).

32 Protein S-acylation, the reversible thioester linkage of a medium length fatty acid, often  
33 palmitic acid, on intracellular cysteine residues, dynamically controls the trafficking and gating of more  
34 than 50 ion channels by increasing the hydrophobicity of protein domains <sup>7</sup>. S-acylation regulates  
35 ligand-gated (AMPA, GABA, Kainate, nAChR, NMDA,  $\text{K}_{\text{ATP}}$ , P2X7 receptors), voltage-gated ( $\text{Ca}_v$ ,  $\text{K}_v$ ,  $\text{K}_{\text{Ca}}$   
36  $\text{Na}_v$ ), epithelial (ENaC), and water channels (AQP4). The S-acylation reaction is mediated by zinc-finger  
37 and DHHC-domain containing Protein AcylTransferases (PATs) at the ER and Golgi <sup>8</sup> and reversed by  
38 acyl protein thioesterases at the PM <sup>9</sup>, with 23 PATs and 5 thioesterases isoforms identified in human

39 so far <sup>10</sup>. Due to the hydrophobic nature of the attached acyl moieties, protein S-acylation impacts the  
40 distribution of proteins in membrane microdomains and between intracellular membranes <sup>11</sup>. Indirect  
41 evidences suggest that ORAI1 activity might also be controlled by S-acylation. First, the human isoform  
42 ORAI1 was identified by acyl-biotinyl exchange chemistry coupled to mass spectrometry as a robustly  
43 S-acylated proteins in primary human T cells <sup>12</sup> and human platelets <sup>13</sup>. Second, the mouse Orai1  
44 orthologue is reportedly to be S-acylated in neural stem cells and in a T-cell hybridoma <sup>14, 15</sup> according  
45 to the protein S-acylation database SwissPalm (<https://swisspalm.org>). Orai isoforms have two  
46 conserved Cys residues at potential S-acylation sites: Cys<sup>143</sup>, located in a privileged S-acylation position  
47 at the edge of the second transmembrane domain (TM2), and Cys<sup>126</sup> within TM2. A third Cys residue,  
48 Cys<sup>195</sup>, sensitive to oxidation <sup>16, 17</sup>, is exposed to the extracellular side and thus unlikely to be S-  
49 acylated. Among these three Cys residue, Cys<sup>143</sup> is the only one conserved in *C. elegans* (Fig. S1).

50 Here, we show that the pore-forming subunit of the CRAC channel ORAI1 can undergo S-  
51 acylation at Cys<sup>143</sup> and that this modification is required for efficient channel activity and for proper  
52 assembly of TCR at the immune synapse. Cys<sup>143</sup> but not Cys<sup>126</sup> substitutions prevents ORAI1 S-acylation  
53 mediated by PAT20. S-acylation-deficient ORAI1-C143A resides in cholesterol-poor membrane  
54 domains, forms tiny PM clusters upon store depletion, mediates reduced SOCE and  $I_{CRAC}$ , and fails to  
55 reach the immune synapse in Jurkat T cells, severely impairing TRC assembly and synapse formation.  
56 S-acylation of ORAI1 therefore controls the recruitment and function of channels and receptors at the  
57 immune synapse to mediate efficient T cell responses.

58

## 59 **Results**

### 60 **The ORAI1 channel can undergo S-acylation on Cysteine 143.**

61 Orai1 can potentially be S-acylated according to the SwissPalm 2.0 S-acylation database  
62 (<https://swisspalm.org/>) that compiles palmitoyl-proteomes<sup>18</sup>. To validate that ORAI1 can undergo S-  
63 acylation, we assessed whether PEG-5k or tritiated palmitate could be incorporated by palmitoyl-  
64 thioester bonds into endogenous ORAI1 channels. HeLa cells were lysed in the presence of N-  
65 ethylmaleimide (NEM) to block free thiols, treated or not with hydroxylamine (HA) to break acyl-  
66 thioester bonds, and then with PEG-5k to label S-acylation sites. A mobility shift was observed in the  
67 presence of PEG-5k on western blots with anti-ORAI1 antibodies (Fig. 1A). Tritiated palmitate was  
68 detected by autoradiography in HeLa cells labelled for 2 h with <sup>3</sup>H-palmitic acid and  
69 immunoprecipitated with anti-ORAI1 antibodies (Fig. 1B). These data show that endogenous ORAI1  
70 channels incorporate palmitic acid and can be labelled by acyl exchange of the acyl moiety with PEG-  
71 5k. A single band of higher molecular weight was observed in the acyl-PEG assay, indicating that a  
72 single residue of the ORAI1 channel can be S-acylated in these conditions. The fact that a non-shifted  
73 ORAI1 band remains indicates that only a sub-population undergoes S-acylation under our  
74 experimental conditions.

75 S-Acylation occurs on cysteine residues, present in ORAI1 at positions 126, 143 and 195, with  
76 C143 conserved up to *C.elegans* (Fig. S1A) and C195 facing the extracellular side (Fig. S1B). To test  
77 whether C126 and/or C143 are S-acylation sites we overexpressed ORAI1-GFP fusion proteins bearing  
78 substitutions at these residues in HeLa cells and evaluated <sup>3</sup>H-palmitate incorporation by  
79 autoradiography. Cells expressing ORAI1-GFP bearing the C143A substitution or the double  
80 C126A/C143A mutation, but not the single C126A mutation, failed to incorporate <sup>3</sup>H-palmitate (Fig.  
81 1C). Identical results were obtained with these ORAI1-GFP mutants expressed in RPE1 cells (Fig. 1D),  
82 establishing that ORAI1 channels can undergo palmitoylation at residue C143.

### 83 **S-acylation potentiates ORAI1 channel function**

84 S-acylation can alter ion channel trafficking, gating, and distribution in membrane lipids. To  
85 understand if S-acylation could affect ORAI1 activity we measured  $\text{Ca}^{2+}$  fluxes carried by ORAI1-GFP  
86 fusion constructs bearing substitutions at C126 and C143. In HEK-293 cells lacking all three ORAI  
87 isoforms (HEK-TKO, kindly provided by Rajesh Bhardwaj <sup>17</sup>), expression of wild-type ORAI1  
88 reconstituted  $\text{Ca}^{2+}$  fluxes upon store depletion (Fig. 1E-F). C143 substitutions by alanine or serine, but  
89 not C126 substitutions, reduced ORAI1-mediated SOCE (Fig. 1E-F). These findings were confirmed by  
90 alanine substitutions in HEK-293 cells stably expressing mCherry-STIM1 (mCh-STIM1) and ORAI1-GFP,  
91 (HEK-S1/O1). Although these cell lines were sorted for the same fluorescence and presented  
92 comparable STIM1 and ORAI1 levels as judged by epifluorescence microscopy (Fig. S1C), SOCE  
93 responses were strongly reduced in cells bearing the C143A mutation (Fig. 2A-B and S1D). We then  
94 recorded  $I_{\text{CRAC}}$  currents in HEK-S1/O1-WT and -C143A cell lines and observed a current density  
95 reduction of 5-fold in cells expressing the C143A mutant (Fig. 2C-D). The currents retained the inward  
96 rectification, positive reversal potential, and  $\text{Gd}^{3+}$ -sensitivity characteristic of highly  $\text{Ca}^{2+}$  selective  
97 CRAC currents (Fig. 2C and 2E) but activated more slowly and failed to inactivate in a significant  
98 fraction of C143A cells (Fig 2F and S2). Our  $\text{Ca}^{2+}$  imaging and electrophysiological data thus establish  
99 that replacing the S-acylated Cys 143 residue within ORAI1 reduces the CRAC channel function.

#### 100 **Acylation increases ORAI1 cluster size, PM mobility, and affinity for lipid rafts.**

101 To gain insight into the underlying mechanism, we then recorded the formation of STIM1 and  
102 ORAI1 clusters during store depletion by TIRF microscopy. ORAI1-C143A clusters were tinier and  
103 occupied a smaller fraction of the TIRF plane (Fig. 3A-B). In contrast, the morphometric parameters of  
104 mCh-STIM1 clusters were not altered (Fig. S3). Lipid incorporation into proteins changes their  
105 lipophilic preference, and potentially their membrane mobility. To assess ORAI1 mobility in the PM  
106 we used fluorescence recovery after photobleaching (FRAP) and measured the lateral diffusion of  
107 ORAI1-GFP in HEK-S1/O1-WT and -C143A cell lines. The C143A mutant had a significantly lower  
108 diffusion coefficient indicative of a reduced mobility in membrane lipids (Fig. 3C). The addition of an  
109 acyl chain to transmembrane proteins increases their hydrophobicity, which may promote their

110 association with lipid microdomains. To study whether S-acylation impacts ORAI1 lipid partitioning,  
111 we generated giant plasma membrane vesicles (GPMV) from HEK-293 cells transiently expressing  
112 ORAI1-YFP and measured the lipid distribution of the WT and mutated channel using the lipid raft and  
113 non-raft markers cholera toxin B and DiD, respectively. ORAI1-C143A co-localized less extensively with  
114 the raft marker in GPMVs from store-replete cells (i.e. not treated with thapsigargin), indicating that  
115 the acylation-deficient mutant has a reduced preference for lipid rafts (Fig. 3D). These results indicate  
116 that the acylation-deficient ORAI1-C143A mutant accumulates in cholesterol-poor lipid domains, has  
117 reduced mobility in the PM and forms tiny clusters upon store depletion. Preventing S-acylation thus  
118 impairs ORAI1 mobility in membrane lipids and its ability to form clusters during SOCE.

### 119 **Protein S-acyl transferase 20 (PAT20) mediates ORAI1 S-acylation**

120 S-Acylation is exerted by DHHC-domain containing protein acyltransferases (PATs) proteins,  
121 which form a large family of enzymes containing 23 members. To identify the enzyme(s) promoting  
122 ORAI1 S-acylation, we transiently transfected ORAI1-GFP in HeLa cells stably expressing different PATs  
123 and measured palmitate incorporation in the immunoprecipitated channel by autoradiography. An  
124 enhanced palmitate incorporation was observed in cells expressing PAT3, PAT7 and PAT20 (Fig. 4A  
125 and S4A). Interestingly, a single band of ~65 kDa was labelled in cells overexpressing PAT20,  
126 corresponding to full-length ORAI1 fused to GFP, while a ~50 kDa band was predominantly detected  
127 in cells overexpressing PAT3 and PAT7, corresponding to a shorter form, likely Orai1 $\beta$  generated by  
128 alternative translation initiation at Met64<sup>19</sup>. We then assessed whether the enhanced ORAI1 S-  
129 acylation conferred by PATs overexpression could modulate channel activity. Enforced expression of  
130 PAT20 but not of PAT3 or PAT7 in HeLa cells enhanced SOCE (Fig. 4B) while siRNA against any of these  
131 PAT isoforms decreased SOCE equally (Fig. S4B). Importantly, PAT20 potentiated SOCE in HEK-293 cells  
132 stably expressing ORAI1-WT but not the C143A mutant (Fig. 4C), indicating that the gain of function  
133 conferred by increased PAT20-driven S-acylation requires this cysteine residue. PAT20-Myc  
134 immunoreactivity decorated reticular intracellular structures that co-localized with ORAI1-GFP  
135 clusters at the cell cortex (Fig. 4D), consistent with this enzyme mediating ORAI1 S-acylation. These

136 experiments indicate that PAT20 mediates ORAI1 S-acylation and that this post-translational  
137 modification enhances SOCE.

### 138 **ORAI1 S-acylation is required for TCR-mediated long-lasting Ca<sup>2+</sup> elevations in Jurkat T cells**

139 Orai1 activity is critical for the function of B and T lymphocytes, which fittingly express PAT20  
140 but neither PAT3 nor PAT7 (Fig. S5A, <http://www.humanproteomemap.org>). To assess whether ORAI1  
141 S-acylation by PAT20 impacts T cell function, we generated by CRISPR an ORAI1-deficient Jurkat T cell  
142 line, in which SOCE was severely blunted (Fig. 5A and S5B-C). Stable transduction of ORAI1-WT  
143 restored SOCE in these cells while ORAI1-C143A expressed at comparable levels was less effective  
144 (Fig. 5A and S5D). Activation of the T cell receptor (TCR) with CD3/CD28 beads evoked long-lasting Ca<sup>2+</sup>  
145 elevations in CRISPR ORAI1 + ORAI1-WT stable cells (Fig. 5B). In contrast, cells reconstituted with  
146 ORAI1-C143A exhibited delayed responses of much smaller amplitude and duration upon TCR  
147 engagement. The Ca<sup>2+</sup> signalling defect persisted when these cells were stimulated with TCR-coated  
148 beads in Ca<sup>2+</sup>-free medium, and subsequent Ca<sup>2+</sup> readmission evoked minimal Ca<sup>2+</sup> responses (Fig 5C).  
149 This indicates that the physiological Ca<sup>2+</sup> signals engaged by the TCR receptors are severely affected  
150 in Jurkat cells expressing acylation-deficient ORAI1-C143A. Accordingly, PAT20 expression augmented  
151 SOCE in WT cells but had no effect in cells lacking ORAI1 (Fig. S5F). We then tested whether the  
152 downstream responses of T cells were similarly affected. Cells bearing the C143A mutation had  
153 reduced nuclear translocation of the transcription factor NFATC1 and IL-2 production following  
154 stimulation with Tg or CD3 beads (Fig. 5D-F-E and S5E). Furthermore, ORAI1 ablation prevented the  
155 potentiating effects of PAT20 expression on the IL-2 secretion evoked by Tg and CD3/CD28 beads (Fig.  
156 S5G). These results indicate that ORAI1 S-acylation at C143A is required for efficient activation of  
157 Jurkat T cells following TCR engagement.

### 158 **ORAI1 S-acylation sustains TCR assembly and signaling at the immune synapse**

159 TCR activation triggers the formation of an immune synapse (IS) between T cells and antigen-  
160 presenting cells, a structure that maximizes the membrane contact area and organizes TCR and  
161 signalling proteins into concentric zones<sup>20</sup>. ORAI1 channels are rapidly recruited into the IS<sup>21, 22</sup> and



162 are required for the formation of dynamic actin structures<sup>23</sup> in a self-organizing process enabling long-  
163 lasting local Ca<sup>2+</sup> signals to initiate gene expression programs that drive T cell proliferation<sup>24</sup>. To test  
164 whether S-acylation impacts the recruitment of ORAI1 to the IS, we imaged CRISPR mediated ORAI1  
165 deficient cells reconstituted with WT or mutant ORAI1-GFP during stimulation with antigen-coated  
166 beads or during plating on coverslips coated with anti-CD3 mAb<sup>25</sup>. As previously reported, ORAI1-GFP  
167 accumulated at sites of bead contact, decorating dynamic cup structures labelled with SiR-Actin (Fig.  
168 6A). Fewer SiR-Actin cups were observed in CRISPR ORAI1 Jurkat cells reconstituted with ORAI1-C143A,  
169 and the mutated GFP-tagged channel was not enriched at sites of contact when cups were detected  
170 (Fig. 6B). To better visualize the molecular organization of the IS, we performed TIRF imaging in  
171 coverslips coated with anti-CD3 mAb. ORAI1-GFP accumulated into contact zones surrounded by SiR-  
172 Actin rings. The formation of actin rings was severely compromised in cells reconstituted with the S-  
173 acylation-deficient ORAI1-C143A channel, which failed to accumulate at contact sites (Fig. 6C and S6A  
174 Suppl Video 1 and 2). The few rings forming in C143A mutant expressing cells had a comparable actin  
175 area (Fig. S6B) but contained less ORAI1-associated GFP fluorescence, detected predominantly in the  
176 centre of the IS (Fig. 6D and S6C). Unexpectedly, TCR cluster formation was also severely impaired in  
177 CRISPR ORAI1 cells reconstituted with acylation-deficient ORAI1. Although the two cell lines had  
178 comparable TCR surface expression (Fig. S6D), the number of CD3 immunoreactive dots within the IS  
179 was reduced 3-fold while their intra-IS distribution remained unaltered in cells reconstituted with  
180 ORAI1-C143A (Fig. 6E and S6C). The extent of co-localisation between ORAI-GFP and CD3  
181 immunoreactivity was reduced in these cells, confirming the differential distribution of the two  
182 proteins in the IS (Fig. 6F and S6D). These data indicate that S-acylation is required for the recruitment  
183 of the ORAI1 channel to the IS and for the formation of TCR clusters that determine the intensity and  
184 duration of TCR signalling at the synapse (Fig. 6G).

185

186

187

188 **Discussion**

189           In this study, we show that S-acylation of ORAI1 at a single cysteine residue enhances the  
190 affinity of the channel for cholesterol rich lipid microdomains and promotes its trapping at the immune  
191 synapse, thereby enabling the local Ca<sup>2+</sup> fluxes that control the proliferation of T cells. Using acyl-PEG  
192 exchange, palmitate incorporation, and mutagenesis, we show that ORAI1 can be chemically modified  
193 by S-acylation and identify the acylation site as Cys143 on the cytosolic rim of the second TM domain.  
194 Substitutions at Cys143 but not at Cys126 within TM2 prevented palmitate incorporation and  
195 decreased SOCE as well as I<sub>CRAC</sub>. A comparable inhibition was observed with cysteine-less ORAI1 in an  
196 earlier study focusing on Cys195 substitutions that prevent I<sub>CRAC</sub> inhibition by hydrogen peroxide <sup>16</sup>.  
197 These data indicate that the ORAI1 channel is S-acylated at Cys143 and that replacement of this  
198 residue, but not of the two other ORAI1 cysteines, prevents S-acylation and impacts channel function.  
199 Cys143 is the only cysteine conserved in all human isoforms and in ORAI1 homologs up to *C.elegans*,  
200 suggesting that S-acylation at this site is an evolutionary conserved function.

201           Using Ca<sup>2+</sup> imaging and electrophysiology, we establish that ORAI1 S-acylation has a significant  
202 functional impact on the channel function. Substitutions at Cys143, but not at Cys126, decreased SOCE  
203 by 50% in HEK-293 cells when the channel was transiently expressed alone and by 80% when it was  
204 stably co-expressed with STIM1. SOCE was also reduced when the S-acylation-defective ORAI1-C143A  
205 was expressed in HEK-293 cells lacking all ORAI isoforms or in Jurkat T cells lacking ORAI1, firmly linking  
206 the SOCE defect to the ORAI1 Cys143 mutation. Patch-clamp recordings confirmed that I<sub>CRAC</sub> currents  
207 were reduced by 80% by the mutation when ORAI1-GFP was stably expressed together with mCh-  
208 STIM1, at identical expression levels. ORAI1-C143A currents retained the characteristic inward  
209 rectification and high Ca<sup>2+</sup> selectivity of CRAC channels but activated more slowly and failed to  
210 inactivate in a significant fraction of cells perfused with 10 mM BATPA in the pipette solution. This  
211 indicates that the C143A mutation does not grossly alter the gating or permeation properties of the  
212 CRAC channel. Instead, its main effect is to decrease the amplitude and to delay the activation of CRAC  
213 currents.

214 We further identify the zinc-finger and DHHC-containing S-acyltransferase zDHHC20 (PAT20)  
215 as mediating the S-acylation reaction. Among an array of PAT exogenously expressed in HeLa cells,  
216 PAT20 was the only isoform that increased the incorporation of tritiated palmitate into full-length  
217 ORAI1-GFP (Orai1 $\alpha$ ). PAT3 and PAT7 promoted palmitate incorporation in a lower band corresponding  
218 to a shorter form of ORAI1 (Orai1 $\beta$ ). PAT20 co-localized with ORAI1-GFP at the cell cortex and unlike  
219 PAT3 and PAT 7 promoted SOCE when expressed. S-acylation by PAT20 thus positively modulates the  
220 activity of both endogenous and exogenously expressed ORAI1 channels. Importantly, SOCE  
221 potentiation was not observed when PAT20 was co-expressed with the acylation-deficient ORAI1-  
222 C143A mutant. This indicates that Cys143 is required for the potentiation by PAT20. Since ORAI1-  
223 C143A was co-expressed with STIM1 in these experiments, they also indicate that potential S-acylation  
224 sites on STIM1 are not relevant for the effect of PAT20. These data indicate that PAT20-mediated S-  
225 acylation at Cys143 enhances ORAI1 channel function.

226 Using biochemical and imaging approaches, we then show that mutating the Cys143 S-  
227 acylation site reduces the size of ORAI1 PM clusters during SOCE. We further show that the mutation  
228 reduces ORAI1 mobility in the PM and prevents its accumulation in ordered lipid domains rich in  
229 cholesterol. ORAI1 PM clusters are the macroscopic signature of ORAI1 trapping by STIM1, a dynamic  
230 event involving the entry and exit of ORAI1 particles into PM domains facing STIM1 molecules on  
231 apposed cortical ER cisternae <sup>26</sup>. Molecularly, ORAI1 trapping reflects the interactions between the  
232 STIM1 CAD domain and ORAI1 C terminal tail, with residues within ORAI1 M4 helix being critical for  
233 trapping and gating. STIM1 clusters, on the other hand, reflect interactions between its lysin-rich C  
234 terminal tail and PM domains rich in negatively charged phospholipids such as PIP2. STIM1 therefore  
235 traps ORAI1 in PIP2-rich domains, while S-acylation increases ORAI1 affinity for cholesterol-rich  
236 domains. The increased mobility of S-acylated ORAI1 in cholesterol-rich domains likely increases its  
237 trapping by STIM1 into neighboring PIP2-rich domains since the escape probability of ORAI1 from  
238 STIM1-ORAI1 complexes is <1% <sup>26</sup>. Increased ORAI1 retention at ER-PM contact sites would promote  
239 the formation of larger channel clusters and enhance transmembrane Ca<sup>2+</sup> fluxes while preserving the

240 biophysical properties of the channel, consistent with our observations. Alternatively, the formation  
241 of large clusters could reflect an increased affinity of S-acylated ORAI1 for STIM1 or increased lateral  
242 interactions between S-acylated channels leading to the formation of high-order channel multimers  
243 corresponding to the larger clusters.

244 By re-expressing the acylation-resistant ORAI1-C143A in ORAI1-deficient Jurkat T cells, we  
245 show that ORAI1 S-acylation is required for the efficient activation of T lymphocytes during TCR  
246 engagement. Replacing the single ORAI1 S-acylation site strongly reduced the long-lasting  $\text{Ca}^{2+}$   
247 elevations driven by TCR engagement and the ensuing NFATC1 translocation and IL-2 production,  
248 signature markers of T cell activation. Unexpectedly, the responses were also reduced in  $\text{Ca}^{2+}$ -free  
249 conditions, indicating that the inhibition of TCR signalling does not simply reflect the impaired channel  
250 function of ORAI1-C143A at the cell surface. Expressing PAT20 increased  $\text{Ca}^{2+}$  responses and TCR-  
251 induced IL-2 secretion in WT but not in ORAI1-deficient Jurkat T cells, confirming that ORAI1 S-  
252 acylation positively modulates TCR signalling. The reliance on S-acylation was most apparent at the IS,  
253 the specialized membrane contact area that form at the interface between T cells and an antigen  
254 presenting cells (APC). We observed three major synapse assembly defects in Jurkat T cells  
255 reconstituted with ORAI1-C143A. First, fewer synapses formed in ORAI1-C143A exposed to CD3-  
256 coated beads or plated on activating coverslips. Second, ORAI1-C143A was poorly recruited to the IS  
257 and the mutant channels accumulated in the IS centre. The IS contains a high percentage of highly  
258 ordered lipids<sup>27</sup> forming lipid rafts migrating to its periphery<sup>28</sup>. S-acylation might target ORAI1  
259 channels to these cholesterol-rich regions to optimize  $\text{Ca}^{2+}$  signalling efficiency at the synapse  
260 periphery (Fig. 6G). Third, the formation of TCR clusters was strongly reduced by the lack of ORAI1 S-  
261 acylation. This defect was unexpected as ORAI1 was not previously reported to control the molecular  
262 dynamics of TCR. During strong antigenic stimuli, TCR form clusters with associated scaffolding and  
263 signalling proteins that segregate in three concentric zones of the IS<sup>29,30</sup>. The clusters migrate from  
264 the periphery towards the centre of the IS where they are sorted for degradation<sup>31,32</sup>, the strength of  
265 signalling reflecting a balance between the formation of new clusters in the periphery and their

266 disassembly in the centre <sup>33</sup>. Defective ORAI1 targeting might impact TCR dynamics in several ways. In  
267 quiescent T cells, Ca<sup>2+</sup> fluxes across ORAI1 channels might disrupt the CD3-lipid interactions that  
268 prevent spontaneous TCR phosphorylation <sup>34</sup>, enhancing the activity state of TCR prior to their  
269 engagement. ORAI1 targeting to specialized PM domains such as filopodia might be required for this  
270 priming effect to occur. Alternatively, ORAI1 channels might control the rates of TCR recycling via  
271 endosomes by promoting the activity of Ca<sup>2+</sup>-dependent actin-severing proteins such as gelsolin. Our  
272 unexpected observation that ORAI1-C143A hinders TCR signalling even in the absence of extracellular  
273 Ca<sup>2+</sup> suggests that ORAI1 might act from an intracellular location to promote endosomal recycling. The  
274 presence of ORAI1 channels in endosomes is well documented <sup>35</sup>, but whether these channels mediate  
275 Ca<sup>2+</sup> efflux from endosomes is not known. Preventing ORAI1 targeting could also impact the location  
276 or activity of integrin receptors such as ICAM-1, thereby indirectly altering the formation of TCR  
277 clusters. Further experiments are required to establish whether ORAI1 S-acylation promotes its  
278 endocytosis and whether S-acylation is dynamic or a one-off event that can impact the affinity of  
279 ORAI1 for accessory proteins or its potential interactions with other channels such as TRPC.

280         In summary, our findings reveal that the ORAI1 channel is regulated by S-acylation. The fatty  
281 acid addition is mediated by PAT20 and targets the channel to lipid-ordered PM domains rich in  
282 cholesterol, thereby facilitating channel trapping by STIM1 during cellular activation. The acylation-  
283 deficient channel failed to accumulate in the IS and prevented the formation of TCR clusters during  
284 TCR engagement, severely impeding the signals that drive T cell proliferation. We propose that S-  
285 acylation dynamically targets the ORAI1 channel to peripheral regions of the synapses rich in  
286 cholesterol to ensure efficient T cell signalling following TCR engagement.

287

288

289

290

291

## 292 **Materials and Methods**

### 293 **Antibodies and reagents**

294 The following reagents were used in this manuscript; Thapsigargin (T9033/CAY10522, Sigma);  
295 Ionomycin (I9657, Sigma); Phorbol 12-myristate 13-acetate (PMA) (79346, Sigma); Fura2-AM, (F1201,  
296 Invitrogen); Fluo-8, AM (21082, AAT Bioquest); SiR-Actin (Far Red, Spirochrome) Cyclopiazonic acid  
297 from *Penicillium cyclopium*, (c1530, Sigma); Gadolinium (G7532, Sigma); Vybrant® Alexa Fluor® 555  
298 Lipid Raft Labeling Kit cholera toxin subunit B (V34404, Thermo-Fisher); Lipophilic Tracer Sampler DiD  
299 (L7781, Thermo-Fisher); Hoechst 33342 (H3570, Thermo-Fisher); Dynabeads™ Human T-Activator  
300 CD3/CD28 (11161D, Thermo-Fisher), GFP-trap agarose (GTA-10, Chromotek), -hydroxylamine (55460,  
301 Sigma, used at 0.5M), Zebra spin desalting columns (PIER89882, Pierce), 3H- palmitic acid (ART0129-  
302 25, American radio labelled chemicals), NEM (04559, Sigma), protein G (17-0618-01, GEHealthcare),  
303 5kDa PEG (63187, Sigma). For protein detection either on Western blot or immunofluorescence, we  
304 used; NFATc1 (clone 7A6, MABS409, Sigma), TCR alpha/beta-PE (12-9986-42, eBioscience™), Anti-  
305 Cholera Toxin, B-Subunit (227040, Sigma), Myc-Tag (9B11) (2276, Cell-Signalling), gamma Tubulin  
306 (4D11) (MA1-850, Thermofisher), ANTI-FLAG® M2 (F1804, Sigma), anti-ORAI1 (600-401-DG9, rockland  
307 immunochemicals Inc), anti-GFP (SAB4301138, Sigma), anti-mouse-HRP and rabbit-HRP (1706516 and  
308 172101, Bio-Rad (USA).

### 309 **Cell culture, cell lines and DNA constructs**

310 Human embryonic kidney (HEK-293T) and Human retinal pigment epithelial-1 (RPE1) cells were  
311 obtained from ATCC (CRL-11268, Manassas, VA, USA) maintained in Dulbecco's modified Eagles  
312 medium (cat. no. 31966-021) supplemented with 10% fetal bovine serum and 1 %  
313 penicillin/streptomycin, and grown at 37°C and 5% CO<sub>2</sub>. HeLa cells purchased from the European  
314 collection of cell culture (ECACC) were grown in MEM Gibco (41090 in the same conditions. HEK-293  
315 cells CRISPR triple knockout for ORAI1, 2 and 3 were a kind gift from Dr. Rajesh Bhardwaj, University  
316 of Bern. HEK-293T Stable cell lines expressing Cherry-Stim1 and hORAI1-WT or mutant C126A, C143A  
317 or C1267C143A were first infected with Cherry STIM1 p2K7 lentiviral vector, sorted, and then infected

318 for the indicated mutants at a MOI of 2 and sorted for the same Cherry-STIM1 and ORAI1-GFP  
319 intensity. Indicated constructs were subcloned into a pWPT vector and co transfected with pCAG-  
320 VSVG/psPAX2 into HEK-293T cells to produce viral particles as described in <sup>36</sup>. Briefly, indicated  
321 constructs were subcloned into a pWPT vector and co transfected with pCAG-VSVG/psPAX2 into HEK-  
322 293T cells to produce viral particles. After accumulation, ultracentrifugation and titration of the virus  
323 these were stored at -80°C. Jurkat T clone E6 cells were purchased from ECACC and grown in RPMI  
324 1640 (21875-034 Life Technologies) supplemented with 10 FCS and 1% Pen/Strep. CRISPR Jurkat T  
325 cells were generated by stably expressing with lentiviral particles pLX-311-Cas9 construct (Addgene  
326 96924) and transiently transfecting with Amaxa® Cell Line Nucleofector® Kit T (Ref: VCA-1002, Lonza)  
327 two sets of sgRNAs (Hs.Cas9.ORAI1.1.AA Ref : 224748421 / Hs.Cas9.ORAI1.1.AB Ref : 224748422, IDT).  
328 Single clone sorting and DNA sequencing were used to validate ORAI1 KO cells. ORAI1 rescue on  
329 CRISPR Jurkat T ORAI1 KO cells was performed by infecting at a MOI of 5 and FACS sorting for GFP  
330 fluorescence. To avoid clonal effects all cells used or generated in this study were pooled populations  
331 with the exception of HEK-TKO for ORAI1/2/3 or Jurkat CRISPR ORAI1 cells which were validated  
332 standard rescue, using either transient (HEK-293) or stable (Jurkat) expression. All cells sorted in this  
333 study were generated using a Beckman Coulter MoFlo Astrios integrated in PSL2 hood.  
334 The ORAI1 - yellow fluorescent protein (YFP) construct was purchased from Addgene (Cambridge,  
335 MA, USA; plasmid no. 19756). Site directed mutagenesis using the Pfu Turbo DNA polymerase from  
336 Agilent Technologies (Santa Clara, CA, USA; 600250) was used to introduce Cysteine mutants C143A,  
337 or S, and C126 A or S). Forward (fwd) and complementary reverse mutagenesis primers (Mycrosynth  
338 (Balgach, Switzerland) were as follows: C143A fwd: 5'-GCG CTC ATG ATC AGC ACC gcC ATC CTG CCC  
339 AAC ATC GAG GC-3', C143S fwd: 5'-GCT CAT GAT CAG CAC CaG CAT CCT GCC CAA CAT CG-3', C126A  
340 fwd: 5'-GCT CAT CGC CTT CAG TGC Cgc CAC CAC AGT GCT GGT GGC-3', C126S fwd: 5'-GCT CAT CGC  
341 CTT CAG TGC CaG CAC CAC AGT GCT GGT GGC-3'. All plasmids encoding for human DHHC1, 2, 3, 6, 7,  
342 13, 17 and 20 were Myc tagged in the N-terminus in pcDNA3 vectors, kindly provided by the Fukata  
343 lab.

344 **Radiolabeling 3H-palmitic acid incorporation**

345 To follow S-acylation, transfected or non-transfected cells were incubated 1 hour in medium without  
346 serum (Glasgow minimal essential medium buffered with 10 mM Hepes, pH 7.4), followed by 2 hours  
347 at 37°C in IM with 200  $\mu$ Cl /ml 3H palmitic acid (9,10-3H(N)), washed with cold PBS prior  
348 immunoprecipitation overnight with anti-ORAI antibodies and protein G-beads or anti-GFP agarose-  
349 coupled beads. Beads were incubated 5 minutes at 90°C in reducing sample buffer prior to SDS-PAGE.  
350 Immunoprecipitates were split into two, run on 4-20% gels and analysed either by autoradiography  
351 (3H-palmitate) after fixation (25% isopropanol, 65% H<sub>2</sub>O, 10% acetic acid), gels were incubated 30  
352 minutes in enhancer Amplify NAMP100, and dried; or Western blotting.

353 **Acyl-Peg-exchange**

354 To block free cysteine, cells were lysed and incubated in 400  $\mu$ l buffer (2.5% SDS, 100 mM HEPES,  
355 1 mM EDTA, 40mM NEM pH 7.5, and protease inhibitor cocktail) for 4 h at 40°C. To remove excess  
356 unreacted NEM, proteins were acetone precipitated and resuspended in buffer (100 mM HEPES, 1  
357 mM EDTA, 1% SDS, pH 7.5). Previously S-acylated cysteines were revealed by treatment with 250 mM  
358 hydroxylamine (NH<sub>2</sub>OH) for 1 hour at 37°C. Cell lysates were desalted using Zebra spin columns and  
359 incubated 1 hour at 37°C with 2mM 5kDa PEG: methoxypolyethylene glycol maleimide. Reaction was  
360 stopped by incubation in SDS sample buffer for 5 minutes at 95°C. Samples were separated by SDS-  
361 PAGE and analysed by immunoblotting.

362 **Ca<sup>2+</sup> imaging and plate reader**

363 Calcium assays in single cell live imaging were performed as described previously<sup>37</sup>. Briefly, cells were  
364 loaded with 3  $\mu$ M Fura-2-AM, in modified Ringer's for 30 min at room temperature (RT). 340/380 nm  
365 excitation and 510  $\pm$  40nm emission ratiometric imaging was performed every 2 seconds. SOCE activity  
366 was triggered by emptying the ER stores by blocking SERCA with Thapsigargin in a Ca<sup>2+</sup>-free solution  
367 containing 1 mM EGTA instead of 2 mM CaCl<sub>2</sub>. Extracellular calcium addition revealed ORAI1 activity.  
368 Jurkat cells attachment to the coverslip was achieved by seeding 200.000 cells in 25mm poly-L lysine  
369 coated coverslips for 25 minutes at RT. When indicated, Jurkat cells were transfected with YFP



370 cameleon (YC 3.6) calcium cytosolic probe to measure cytosolic calcium. YC 3.6 was excited at 440nm  
371 and emission was collected alternatively at 480 and 535 nm. Calcium imaging in HEK-293 cells Triple  
372 Knockout for ORAI1,2 and 3 was performed in plate reader using Fura2 as calcium Dye. Fluorescence  
373 was measured using a 96-well microplate reader with automated fluid additions at 37 °C (FlexStation  
374 3, Molecular Devices).

#### 375 **TIRF imaging.**

376 TIRF imaging to determine ORAI and STIM clusters in HEK-293 cells S1/O1 was performed on a Nikon  
377 Eclipse Ti microscope equipped with a Perfect Focus System (PFS III) using a 100× oil CFI Apochromat  
378 TIRF Objective (NA 1.49; Nikon Instruments Europe B.V.). To observe STIM1/ORAI1 clusters cells were  
379 bathed with CPA 10μM and imaged every 20 seconds in calcium free solution. Jurkat T cell lines were  
380 used in TIRF to image immune Synapse. Actin was imaged by loading Jurkat T cells ( $1 \times 10^5$ ) with SiR-  
381 Actin (500nM) for 30 min at 37 °C 5% CO<sub>2</sub>. 500.000 Jurkat T cells were seeded on CD3 (OKT3, 1μg/ml)  
382 coated glass coverslips (25mm) at the beginning of the experiment and imaged every 1 minutes for 25  
383 minutes. Then, TCRα/β-PE conjugated antibody was added (1:1000) in order to image TCR cluster  
384 formation in the IS in living cells. For both cell lines, ORAI1 was imaged using ZET488/10 excitation  
385 filter (Chroma Technology Corp.). STIM1 cherry (in HEK-293 cells) or TCR clusters were imaged using a  
386 ZET 561/10 excitation filter (Chroma Technology Corp., Bellows Falls, VT). SiR-Actin was measured  
387 using 640 nm laser line. All emission signals were collected by a cooled EMCCD camera (iXon Ultra  
388 897, Andor Technology Ltd). All experiments were performed at room temperature (22-25° C).

#### 389 **Confocal live imaging, FRAP and Beads assay**

390 Confocal time lapse microscopy was used to image JurkaT cells with CD3/CD28 beads and  
391 Fluorescence recovery after photobleaching. For IS we used Jurkat ORAI1 expressing cells loaded with  
392 SiR to visualize Actin (same protocol as for TIRF). 500.000 Jurkat cells were seeded on Poly-L lysine  
393 coated glass coverslips (25mm) for 25 minutes at RT. Beads (1:1 bead cell ratio) were added after 2  
394 minutes of imaging of the experiment and imaged every 2 in a XYZ configuration (Z stack spanning  
395 all cell with 1 μm of thickness) for minutes for 25 minutes at RT. Images were obtained in a Nikon A1r

396 Spectral with a 60x 1.4 CFI Plan Apo Lambda WD:0.13mm objective using 488 and 639 laser lines.  
397 Image analysis was performed by selecting in focus stacks where the bead was observed and  
398 measuring ORAI1 or SiR-Actin fluorescence over time in the bead contact area normalized to the  
399 fluorescence of the opposite pole as described previously<sup>38</sup>.

400 FRAP was performed in HEK-293 S1/O1 under resting condition using the same microscope. ORAI1  
401 FRAP was accomplished by following the protocol previously described<sup>39</sup>. Briefly, we used a live  
402 chamber at 37°C and 5% CO<sub>2</sub>. Pinhole was settled at 1AU and images were sampled every 3 seconds  
403 for 100 images. Bleaching was for 20 seconds (488nm 100% output) after 1 minute of basal acquisition.  
404 ROI of interest was compared to the same size ROI in the same field of view and normalized to basal.  
405 Traces were fitted with an exponential one-phase association model to obtain the half-life,  $\tau_{1/2}$  and  
406 fluorescence recovery. Diffusion coefficient was calculated with the formula  $D = 0.224r^2/(\tau_{1/2})$ , in  
407 which r is the radius of the bleached circle region as described in<sup>39</sup>.

#### 408 **Flow cytometry**

409 Cytometry calcium experiments on Jurkat cells were performed by incubation with Fluo8 (2 $\mu$ M 30  
410 min, RT) and washed for 15 minutes in a calcium containing solution. BD Accuri C6 was used to  
411 measure calcium movements over time by setting the flow at 1 $\mu$ L per second. Every experiment  
412 started with 5 x 10<sup>5</sup> cells in 510  $\mu$ L of calcium free solution (1mM EGTA). After 1 min 50 $\mu$ L of Tg 10 $\mu$ M  
413 was added to empty ER stores. After 300 seconds we added 100  $\mu$ L of CaCl<sub>2</sub> (Final concentration  
414 2.5mM) to reveal SOCE. IL-2 measurements were performed as described previously<sup>40</sup>. Briefly, Jurkat  
415 cells (50.000) were seeded in pre coated CD3 (OKT3) round bottom 96 cell plates for 2 days. Cells were  
416 then fixed (PFA 4%) and perm/blocked with PBS-2%BSA 0.5% Saponin previous to IL-2 PE incubation.  
417 IL-2 FACS measurements were acquired in a BDLSR Fortessa unit.

#### 418 **Giant Plasma Membrane Vesicles (GPMV)**

419 GPMVs were formed and analysed following this protocol<sup>41</sup>. Briefly, HEK-293 cells were seeded in  
420 poly-L-lysine coated 25mm glass coverslips and transfected with YFP-ORAI1 WT or the C143A mutant.  
421 The day after cells were washed with GPMV buffer (150mM NaCl, 2mM CaCl<sub>2</sub> and 10mM HEPES, pH:

422 7.4) and incubated for 1h at 37°C 5% CO<sub>2</sub> with a vesiculation buffer (25mM PFA, 2mM DTT,). Cell super  
423 natant was then spun for 30 minutes at 20.000 x g and incubated with Alexa-555 Cholera Toxin B  
424 subunit and DiD (Far red) lipid staining markers for 10 minutes on ice. Imaging was performed at 10°C  
425 using Open Perfusion Microincubator (PDMI-2, Medical Systems, Greenvale, NY) temperature  
426 controller to enhance lipid partitioning. Vesicles were imaged using a Nikon A1r Spectral with a 60x  
427 1.4 CFI Plan Apo Lambda WD:0.13mm objective using 488, 551 and 639 laser lines.

#### 428 **Electrophysiology**

429  $I_{CRAC}$  currents were recorded using the whole-cell configuration in HEK-293 cells stably expressing  
430 mCherry-STIM1 and ORAI1-GFP (O1/S1) bearing or not the C143A mutation. The cells were  
431 trypsinized, seeded on 35 mm dishes (Corning, NY, USA) and incubated overnight at 37 °C to allow  
432 attachment of separated cells. The experiments were performed at room temperature. Pipettes were  
433 pulled from 1.5 mm thin-wall glass capillaries (GC150TF, Harvard Apparatus) using a vertical PC-10  
434 Narishige puller to obtain a resistance between 2-4 MΩ. Currents were recorded with pCLAMP 10.7  
435 software (Molecular Devices, Sunnyvale, CA, USA), using the Axopatch 200B amplifier (Axon  
436 Instruments, Molecular Devices) with a low-pass filtering at 1 kHz, and digitized with the Axon  
437 Digidata 1440A at 1 ms. Voltage ramps of 180 ms were applied from -120 to +100 mV every 5 seconds  
438 from a holding potential of 0 mV. Peak current densities ( $I_{max}$ ) were measured at -100 mV after  
439 subtraction of basal or 10 μM GdCl<sub>3</sub>-insensitive currents. The standard 10 mM Ca<sup>2+</sup> recording solution  
440 contained 130 mM NaCl, 5 mM KCl, 1 mM MgCl<sub>2</sub>, 10 mM CaCl<sub>2</sub> and 10 mM HEPES (300-310 mOsm,  
441 pH 7.4 adjusted with NaOH). The intracellular pipette solution contained 130 mM Cs  
442 methanesulfonate, 8 mM MgCl<sub>2</sub>, 10 mM BAPTA, and 10 mM HEPES (290-300 mOsm, pH 7.2 adjusted  
443 with CsOH).

#### 444 **Immunofluorescence**

445 PAT20 and ORAI1 immunofluorescence was performed in HeLa cells co-transfected with ORAI1-YFP  
446 and PAT20-myc. After 24h of transfection, cells were fixed (Pfa 4%) for 20 min at RT, then  
447 permeabilized (PBS-BSA0.5% + NP-40 0.1%) for 10 minutes and then blocked (PBS-BSA0.5% + FBS 5%)

448 for 1h at RT. Then cells were incubated with primary antibodies O/N at 4°C then with secondary 1:1000  
449 with Hoesch 1:5000 for 1h at RT. For NFAT translocation Jurkat cells were treated with the indicated  
450 compounds (Tg 1µM or CD3 plastic coated plates) for the indicated times and seeded into poly-L lysine  
451 coated coverslips for 15 minutes at RT. Immunofluorescences for NFATC1 were performed as  
452 described for HeLa cells. NFATC1 analysis was done by dividing the nuclear to the cytosolic (total-  
453 nuclear) pixel intensity per cell into 3 to 5 randomized fields per condition. Images were obtained in  
454 a LSM700 Nikon microscope.

#### 455 **Image analysis and statistics**

456 All images were analysed using ImageJ software. Co-localisation and particle concentric counting for  
457 TCR were performed by applying a previously described macro <sup>42</sup>.

#### 458 **Data availability**

459 The data that support the findings of this study are available from the corresponding author upon  
460 reasonable request.

#### 461 **Acknowledgements**

462 We are grateful to Cyril Castelbou for the technical assistance, the bioimaging and flow cytometry  
463 facilities (Geneva Medical Centre). This work was funded by the Swiss National Foundation [grant  
464 number 310030\_189042 (to ND) and SNF 310030B\_176393 and 310030\_192608 European Research  
465 Council under the European Union's Seventh Framework Programme (FP/2007-2013) / ERC Grant  
466 Agreement n. 340260 - PalmERa' (to GvG.).

#### 467 **Author contributions**

468 ACS, Conception and design, Acquisition of data, Analysis and interpretation of data, Drafting or  
469 revising the article; JK, MB, LA, & MF, Acquisition of data, Analysis and interpretation of data; GvG &  
470 ND, Conception and design, Analysis and interpretation of data, Drafting or revising the article.

#### 471 **Competing Financial Interests**

472 The authors have no competing financial interests.

473



475 **Figures Legends**

476

477 **Fig. 1. ORAI1 is S-acylated at Cysteine C143.**

478 (A) ORAI1 immunoblot of HeLa cells treated with PEG-5k to label S-acylation sites after exposure to  
479 NEM to block free thiols and then to hydroxylamine (HA) to break acyl-thioester bonds. (B) Western  
480 blot and corresponding autoradiogram of HeLa cells labelled for 2 h with  $^3\text{H}$ -palmitic acid with or  
481 without HA and immunoprecipitated with anti-ORAI1. (C, D) Western blots and corresponding  
482 autoradiograms of HeLa (C) and RPE-1 (D) cells expressing the indicated GFP-tagged ORAI1 mutants  
483 labelled with  $^3\text{H}$ -palmitic acid and immunoprecipitated with anti-GFP. Blots are representative of 3  
484 independent experiments. (E) Normalized mean fura-2 responses evoked by  $\text{Ca}^{2+}$  readmission in HEK-  
485 TKO cells transiently transfected with the indicated ORAI1-GFP constructs and exposed to Tg. (F) Peak  
486 amplitude of the responses in E after background subtraction. Data are mean $\pm$ SEM of 8 independent  
487 experiments. One way ANOVA Dunnett's multiple comparisons test.

488

489 **Fig. 2. Preventing ORAI1 S-acylation reduces  $I_{\text{CRAC}}$  currents**

490 (A) Normalized fura-2 responses evoked by  $\text{Ca}^{2+}$  readmission to Tg-treated HEK-293 cells stably  
491 expressing mCh-STIM1 and ORAI1-GFP (O1/S1) bearing or not the C143A mutation. (B) Peak amplitude  
492 of the responses in A. Data are mean $\pm$ SEM of 196 (WT) and 198 (C143A) cells from 5 independent  
493 experiments. (C) Representative  $I_{\text{CRAC}}$  recordings of WT and C143A O1/S1 cells, measured every 5  
494 seconds at -100 mV.  $I_{\text{CRAC}}$  was activated by cell dialysis with 10 mM BAPTA and blocked by 10  $\mu\text{M}$   $\text{Gd}^{3+}$ .  
495 (D) Current-voltage relationship of the peak current in the cells shown in C (mean $\pm$ SEM). (E) Peak  
496 current densities ( $I_{\text{max}}$ ) of WT and C143A O1/S1 cells after subtraction of basal or  $\text{Gd}^{3+}$ -insensitive  
497 currents. (F) Time-course of current activation in cells without pre-activated currents. Left: Recordings  
498 were aligned to the first inflexion point and basal and maximal values set to 0 and 1, respectively.  
499 Right: Statistical evaluation of the activation time. Data are mean $\pm$ SEM, number of cells is indicated  
500 on the graphs. Two-tailed unpaired Student's *t*-test.

501 **Fig. 3. Preventing ORAI1 S-acylation reduces channel clustering and affinity for lipid rafts.**

502 (A) Representative TIRF images of WT and C143 O1/S1 cells exposed to 10  $\mu$ M CPA for 10 min to induce  
503 mCh-STIM1 and ORAI1-GFP clustering Bars = 5  $\mu$ m. (B) Averaged size of individual ORAI1-GFP clusters  
504 (left) and extent of PM covered by clusters (right) after CPA treatment. Data are mean $\pm$ SEM of 29 (WT)  
505 and 30 (C143A) cells from 3 independent experiments. (C) FRAP recordings from WT and C143 O1/S1  
506 cells. Top: representative GFP images. Bottom: representative fluorescence decay and recovery (left),  
507 diffusion coefficients (middle), and fluorescence plateau values (right). Data are mean $\pm$ SEM of 21 (WT)  
508 and 15 (C143A) cells from 3 independent experiments Bars = 5  $\mu$ m. (D) Lipid partitioning of ORAI1 in  
509 giant vesicles from HEK-293 cells transiently transfected with WT or C143 ORAI1-GFP. Top:  
510 representative fluorescence images of vesicles from cells expressing WT or C143 ORAI1-GFP (green)  
511 stained with cholera toxin subunit B (red) as raft marker and DiD (white) as non-raft marker top bar =  
512 3  $\mu$ m; bottom bar = 2 $\mu$ m. Bottom: Manders co-localization index for the indicated staining and  
513 conditions. Data are mean $\pm$ SEM of 11 (WT) and 10 (C143A) vesicles from 3 independent experiments.  
514 Two-tailed unpaired Student's *t*-test.

515

516 **Fig. 4. PAT20 S-acylates ORAI1 and modulates its activity**

517 (A) Western blot and matching autoradiogram of RPE-1 cells expressing ORAI1-GFP plus the indicated  
518 PAT isoform, labelled with  $^3$ H-palmitic acid and immunoprecipitated with anti-GFP. Representative of  
519 3 independent experiments. (B) Functional effect of PAT3, 7, and 20 expression. Western blot of HeLa  
520 cells expressing Myc-tagged PAT isoforms (left), averaged SOCE responses (middle), and peak  
521 amplitude (right). Data are mean $\pm$ SEM of 49-74 cells from 3 independent experiments. (C) Averaged  
522 SOCE responses of WT (left) or C143A (middle) S1/O1 cells expressing these PAT isoforms and their  
523 peak amplitude (right). Data are mean $\pm$ SEM of 31-129 cells from 5 independent experiments. (D)  
524 Confocal images of HeLa cells expressing Myc-tagged PAT20, treated or not with Tg (600s). Graphs  
525 show co-localization coefficients of Myc immunoreactivity with ORAI1-GFP, indicated by arrows on  
526 images. Bar = 10  $\mu$ m. One way ANOVA Dunnett's multiple comparisons test.

527 **Fig. 5. ORAI1 S-acylation promotes Jurkat T cell activation**

528 (A) Averaged fura-2 responses and their peak amplitude evoked by Tg in Jurkat T cells lines generated  
529 by CRISPR with control or ORAI1-targeted guiding sequences and stably re-expressing either WT or  
530 C143A ORAI1-GFP. (B) Representative Fura-2 recordings of the indicated cell lines exposed to  
531 CD3/CD28-coated beads in physiological saline (left). Graph bars show the peak values evoked by  
532 CD3/CD28 beads in individual cells during the recording period. The percentages of cells with one or  
533 more elevation exceeding a threshold of 150% above basal is indicated. Data are from 102 cells (WT)  
534 and 124 cells (C143A) from 3 independent experiments. (C) Representative Fura-2 recordings of  
535 indicated cells exposed to CD3/CD28 beads in Ca<sup>2+</sup>-free media and then to 1 mM and 2 mM Ca<sup>2+</sup> (left),  
536 and peak amplitude of these responses (right). Graph data are mean±SEM of 228 cells (WT) and 185  
537 cells (C143A) from 3 independent experiments. (D) NFATC1 translocation evoked by Tg in the indicated  
538 cell lines. Data are mean±SEM of the nuclear to cytosol NFATC1-GFP intensity ratio of 58-161 cells  
539 from 4 independent experiments. (E) Time-course of NFATC1 translocation evoked by CD3 (OKT3  
540 1µg/ml). Data are mean±SEM of 51-132 cells from 3 independent experiments. (F) IL-2 production  
541 evoked by CD3 (OKT3 1µg/ml). Data are mean±SEM of 3 independent experiments. One way ANOVA  
542 Dunnett's multiple comparisons test (A and D) or two-tailed unpaired Student's *t*-test.

543

544 **Fig. 6. ORAI1 S-acylation regulates TCR clustering and signaling at the immune synapse**

545 (A) Confocal images of ORAI1-deficient Jurkat T cells reconstituted with WT or mutant ORAI1-GFP,  
546 stained with SiR-Actin during initial contact with CD3/CD28-coated beads (visible by their  
547 autofluorescence in the GFP channel). Graphs show fluorescence intensities along IS-centred  
548 transcellular sections indicated by rectangles on GFP images. Dotted lines on SiR-Actin image indicate  
549 the zoomed regions. (B) Time-course of ORAI1-GFP (left) and SiR-Actin (right) accumulation at synapses  
550 forming in cells reconstituted with ORAI1-WT (5 cells) and ORAI1-C143A (3 cells). Two-ways ANOVA.  
551 (C) TIRF images of these cells stained with SiR-Actin and then with anti-TCR mAb after plating on  
552 activating coverslips coated with anti-CD3 mAb. Sketches show densities of TCR and ORAI1 in different



553 concentric regions within the IS (Bar = 10  $\mu\text{m}$ ). (D) Averaged ORAI-GFP fluorescence and (E) numbers  
554 of TCR clusters within IS forming in these two Jurkat T cell lines. (F) Manders co-localisation index for  
555 TCR and ORAI1 WT or mutant. Data are mean $\pm$ SEM of 28-61 cells from four independent experiments.  
556 Two-tailed unpaired Student's *t*-test. (G) Scheme representing the effect of ORAI1 S-acylation on IS  
557 molecular composition and function. Addition of palmitate to ORAI1 channels by PAT20 targets the  
558 channel to lipid-ordered PM domains, promoting the formation of concentric ORAI1 and TCR clusters  
559 engaging MHC at the immune synapse. The resulting sustained local  $\text{Ca}^{2+}$  elevations (in red) induce  
560 nuclear translocation of NFATC1 to trigger IL-2 production. (H) Scheme representing the observed  
561 phenotype in TIRFF, where C143A mutant cells would accumulate less ORAI1 at the IS, it would  
562 redistribute in the centre and would have less TCR dots.

563

#### 564 **Supplementary Fig. 1 (related to Fig. 1)**

565 (A) Orai1 protein sequences aligned with CLustalW algorithm for the indicated organisms. Cysteines  
566 susceptible to be S-acylated are highlighted in yellow. (B) Schematic ORAI1 representation.  
567 Superimposed structures of the WT and H206A dOrai (PDB ID: 4HKR and 6BBF) conformations in  
568 ribbon representation highlighting cysteine residues at position 126, 143 and 195 (C) Fluorescence  
569 images of WT O1/S1 cells (left) and averaged mCh-STIM1 and ORAI1-GFP fluorescence of the different  
570 O1/S1 stable cell lines. (D) Averaged fura-2 responses (left) and peak amplitude (right) of O1/S1 cells  
571 bearing or not the indicated ORAI1 mutation(s). Data are mean $\pm$ SEM of 44-82 cells from two  
572 independent experiments. One way ANOVA Dunnett's multiple comparisons test.

573

#### 574 **Supplementary Fig. 2 (related to Fig. 2)**

575 (A) Number of recorded WT and C143A O1/S1 cells exhibiting or not  $I_{\text{CRAC}}$  inactivation. Chi-square p  
576 value: 0.0237, two-sided Fisher's exact test.

577

#### 578 **Supplementary Fig. 3 (related to Fig. 3)**

579 Time-course of CPA-induced changes in the number, size ( $\mu\text{m}^2$ ), and extent of PM covered by ORAI1-  
580 GFP (left) and mCh-STIM1 (right) clusters in WT and C1434A O1/S1 cells. Data are mean $\pm$ SEM of 29  
581 (WT) and 30 (C143A) cells from 3 independent experiments. Two-Way ANOVA fitting mixed model.

582

583 **Supplementary Fig. 4 (related to Fig. 4)**

584 (A)  $^3\text{H}$ -palmitate incorporation in RPE-1 cells expressing ORAI1-GFP plus the indicated PAT isoforms as  
585 in Fig. 4A, normalized for expression levels. Data are from 2 independent experiments. (B) PAT3, PAT7,  
586 and PAT20 expression levels (left), averaged SOCE responses (middle), and peak amplitude (right) in  
587 HEK-293T- S1/O1-WT cells transfected with the indicated siRNAs. Data are mean $\pm$ SEM of 61-126 cells  
588 from 2 independent experiments. One way ANOVA Dunnett's multiple comparisons test.

589

590 **Supplementary Fig. 5 (related to Fig. 5)**

591 (A) ORAI1, PAT3, PAT7, and PAT20 abundance in proteomes from different tissues (from  
592 <http://www.humanproteomemap.org/> consulted on Dec. 16, 2020). (B) Sequences of genomic DNA  
593 used to generate the CRISPR ORAI1 Jurkat T cell lines (top) and FLAG immunoblot of Jurkat T cells  
594 expressing FLAG-tagged Cas9 (bottom). (C) Representative flow cytometry Fluo 8 responses evoked  
595 by the Tg/ $\text{Ca}^{2+}$  protocol in the indicated cells (top) and their averaged response and peak amplitude  
596 (bottom). Data are mean $\pm$ SD of 2 independent experiments. (D) Fluorescence intensity profiles of  
597 CRISPR ORAI1 cells reconstituted with WT and C143 ORAI1-GFP measured by flow cytometry (N = 4).  
598 (E) Fluorescence images of CRISPR ORAI1 cells reconstituted with WT and C143 ORAI1-GFP cells  
599 blotted against NFATC1 ab treated or not with Tg to induce nuclear translocation of NFATC1 Bar = 10  
600  $\mu\text{m}$ . (F) Averaged SOCE responses (left) and peak SOCE amplitude (right) measured with YC3.6 in  
601 indicated cells expressing PAT20 or the empty vector (PCDNA3) (CRISPR Control + vector, 34 cells;  
602 CRISPR Control +PAT20, 40 cells; CRISPR ORAI1 +vector, 10 cells; CRISPR ORAI1+PAT20, 12 cells). (G)  
603 IL-2 positive cells in same cells as F treated with Tg or CD3/CD28 beads plus Ionomycin  $1\mu\text{M}$  +PMA  
604 20nM for 2h. One way ANOVA Dunnett's multiple comparisons test.

605

606 **Supplementary Fig. 6 (related to Fig. 6)**

607 (A) Fraction of CRISPR ORAI1 cells reconstituted with WT or C143A ORAI1-GFP forming actin rings upon  
608 plating onto activating coverslips (WT = 258 cells C143A = 235 cells). (B) Averaged IS area of indicated  
609 cells forming actin rings. (C) Percentage of ORAI1 (left) and TCR (middle) signal originating from  
610 different concentric regions within the IS depicted in the sketch (right). WT = 44 cells; C143A = 27 cells.  
611 (D) TCR-PE intensity profiles of these cell lines (N = 3). Data are mean $\pm$ SEM of three experiments. Two-  
612 tailed unpaired Student's *t*-test (C) or Fisher's exact test (A).

613

614 **References**

615

- 616 1. Lacruz, R.S. & Feske, S. Diseases caused by mutations in ORAI1 and STIM1. *Ann N Y Acad Sci*  
617 **1356**, 45-79 (2015).
- 618 2. Gudlur, A. *et al.* Calcium sensing by the STIM1 ER-luminal domain. *Nat Commun* **9**, 4536  
619 (2018).
- 620 3. Hirve, N., Rajanikanth, V., Hogan, P.G. & Gudlur, A. Coiled-Coil Formation Conveys a STIM1  
621 Signal from ER Lumen to Cytoplasm. *Cell Rep* **22**, 72-83 (2018).
- 622 4. Qiu, R. & Lewis, R.S. Structural features of STIM and Orai underlying store-operated calcium  
623 entry. *Curr Opin Cell Biol* **57**, 90-98 (2019).
- 624 5. Hou, X., Pedi, L., Diver, M.M. & Long, S.B. Crystal structure of the calcium release-activated  
625 calcium channel Orai. *Science* **338**, 1308-1313 (2012).
- 626 6. Hou, X., Burstein, S.R. & Long, S.B. Structures reveal opening of the store-operated calcium  
627 channel Orai. *Elife* **7** (2018).
- 628 7. Shipston, M.J. Ion channel regulation by protein palmitoylation. *J Biol Chem* **286**, 8709-8716  
629 (2011).
- 630 8. Ohno, Y., Kihara, A., Sano, T. & Igarashi, Y. Intracellular localization and tissue-specific  
631 distribution of human and yeast DHHC cysteine-rich domain-containing proteins. *Biochim*  
632 *Biophys Acta* **1761**, 474-483 (2006).
- 633 9. Yokoi, N. *et al.* Identification of PSD-95 Depalmitoylating Enzymes. *J Neurosci* **36**, 6431-6444  
634 (2016).
- 635 10. Tabaczar, S., Czogalla, A., Podkalicka, J., Biernatowska, A. & Sikorski, A.F. Protein  
636 palmitoylation: Palmitoyltransferases and their specificity. *Exp Biol Med (Maywood)* **242**,  
637 1150-1157 (2017).
- 638 11. Rocks, O. *et al.* The palmitoylation machinery is a spatially organizing system for peripheral  
639 membrane proteins. *Cell* **141**, 458-471 (2010).
- 640 12. Morrison, E. *et al.* Quantitative analysis of the human T cell palmitome. *Sci Rep* **5**, 11598  
641 (2015).
- 642 13. Dowal, L., Yang, W., Freeman, M.R., Steen, H. & Flaumenhaft, R. Proteomic analysis of  
643 palmitoylated platelet proteins. *Blood* **118**, e62-73 (2011).
- 644 14. Martin, B.R., Wang, C., Adibekian, A., Tully, S.E. & Cravatt, B.F. Global profiling of dynamic  
645 protein palmitoylation. *Nat Methods* **9**, 84-89 (2011).
- 646 15. Li, Y., Martin, B.R., Cravatt, B.F. & Hofmann, S.L. DHHC5 protein palmitoylates flotillin-2 and  
647 is rapidly degraded on induction of neuronal differentiation in cultured cells. *J Biol Chem*  
648 **287**, 523-530 (2012).
- 649 16. Bogeski, I. *et al.* Differential redox regulation of ORAI ion channels: a mechanism to tune  
650 cellular calcium signaling. *Sci Signal* **3**, ra24 (2010).
- 651 17. Alansary, D. *et al.* Thiol dependent intramolecular locking of Orai1 channels. *Sci Rep* **6**, 33347  
652 (2016).
- 653 18. Blanc, M. *et al.* SwissPalm: Protein Palmitoylation database. *F1000Res* **4**, 261 (2015).
- 654 19. Fukushima, M., Tomita, T., Janoshazi, A. & Putney, J.W. Alternative translation initiation  
655 gives rise to two isoforms of Orai1 with distinct plasma membrane mobilities. *J Cell Sci* **125**,  
656 4354-4361 (2012).
- 657 20. Bromley, S.K. *et al.* The immunological synapse. *Annu Rev Immunol* **19**, 375-396 (2001).
- 658 21. Liudyno, M.I. *et al.* Orai1 and STIM1 move to the immunological synapse and are up-  
659 regulated during T cell activation. *Proc Natl Acad Sci U S A* **105**, 2011-2016 (2008).
- 660 22. Barr, V.A. *et al.* Dynamic movement of the calcium sensor STIM1 and the calcium channel  
661 Orai1 in activated T-cells: puncta and distal caps. *Mol Biol Cell* **19**, 2802-2817 (2008).
- 662 23. Hartzell, C.A., Jankowska, K.I., Burkhardt, J.K. & Lewis, R.S. Calcium influx through CRAC  
663 channels controls actin organization and dynamics at the immune synapse. *Elife* **5** (2016).

- 664 24. Feske, S., Giltzane, J., Dolmetsch, R., Staudt, L.M. & Rao, A. Gene regulation mediated by  
665 calcium signals in T lymphocytes. *Nat Immunol* **2**, 316-324 (2001).
- 666 25. Bunnell, S.C., Kapoor, V., Tribble, R.P., Zhang, W. & Samelson, L.E. Dynamic actin  
667 polymerization drives T cell receptor-induced spreading: a role for the signal transduction  
668 adaptor LAT. *Immunity* **14**, 315-329 (2001).
- 669 26. Wu, M.M., Covington, E.D. & Lewis, R.S. Single-molecule analysis of diffusion and trapping of  
670 STIM1 and Orai1 at endoplasmic reticulum-plasma membrane junctions. *Mol Biol Cell* **25**,  
671 3672-3685 (2014).
- 672 27. Zech, T. *et al.* Accumulation of raft lipids in T-cell plasma membrane domains engaged in TCR  
673 signalling. *EMBO J* **28**, 466-476 (2009).
- 674 28. Owen, D.M., Williamson, D.J., Magenau, A. & Gaus, K. Sub-resolution lipid domains exist in  
675 the plasma membrane and regulate protein diffusion and distribution. *Nat Commun* **3**, 1256  
676 (2012).
- 677 29. Monks, C.R., Freiberg, B.A., Kupfer, H., Sciaky, N. & Kupfer, A. Three-dimensional segregation  
678 of supramolecular activation clusters in T cells. *Nature* **395**, 82-86 (1998).
- 679 30. Grakoui, A. *et al.* The immunological synapse: a molecular machine controlling T cell  
680 activation. *Science* **285**, 221-227 (1999).
- 681 31. Lee, K.H. *et al.* The immunological synapse balances T cell receptor signaling and  
682 degradation. *Science* **302**, 1218-1222 (2003).
- 683 32. Varma, R., Campi, G., Yokosuka, T., Saito, T. & Dustin, M.L. T cell receptor-proximal signals  
684 are sustained in peripheral microclusters and terminated in the central supramolecular  
685 activation cluster. *Immunity* **25**, 117-127 (2006).
- 686 33. Yokosuka, T. & Saito, T. The immunological synapse, TCR microclusters, and T cell activation.  
687 *Curr Top Microbiol Immunol* **340**, 81-107 (2010).
- 688 34. Shi, X. *et al.* Ca<sup>2+</sup> regulates T-cell receptor activation by modulating the charge property of  
689 lipids. *Nature* **493**, 111-115 (2013).
- 690 35. Yu, F., Sun, L. & Machaca, K. Constitutive recycling of the store-operated Ca<sup>2+</sup> channel Orai1  
691 and its internalization during meiosis. *J Cell Biol* **191**, 523-535 (2010).
- 692 36. Salmon, P. Generation of human cell lines using lentiviral-mediated genetic engineering.  
693 *Methods Mol Biol* **945**, 417-448 (2013).
- 694 37. Nunes, P. *et al.* STIM1 juxtaposes ER to phagosomes, generating Ca<sup>2+</sup>(+) hotspots that boost  
695 phagocytosis. *Curr Biol* **22**, 1990-1997 (2012).
- 696 38. Quintana, A. *et al.* Calcium microdomains at the immunological synapse: how ORAI channels,  
697 mitochondria and calcium pumps generate local calcium signals for efficient T-cell activation.  
698 *EMBO J* **30**, 3895-3912 (2011).
- 699 39. Zhou, Y. *et al.* Cross-linking of Orai1 channels by STIM proteins. *Proc Natl Acad Sci U S A* **115**,  
700 E3398-E3407 (2018).
- 701 40. Miller, M. *et al.* ORMDL3 transgenic mice have increased airway remodeling and airway  
702 responsiveness characteristic of asthma. *J Immunol* **192**, 3475-3487 (2014).
- 703 41. Sezgin, E. *et al.* Elucidating membrane structure and protein behavior using giant plasma  
704 membrane vesicles. *Nat Protoc* **7**, 1042-1051 (2012).
- 705 42. Bravo, R. *et al.* Increased ER-mitochondrial coupling promotes mitochondrial respiration and  
706 bioenergetics during early phases of ER stress. *J Cell Sci* **124**, 2143-2152 (2011).
- 707

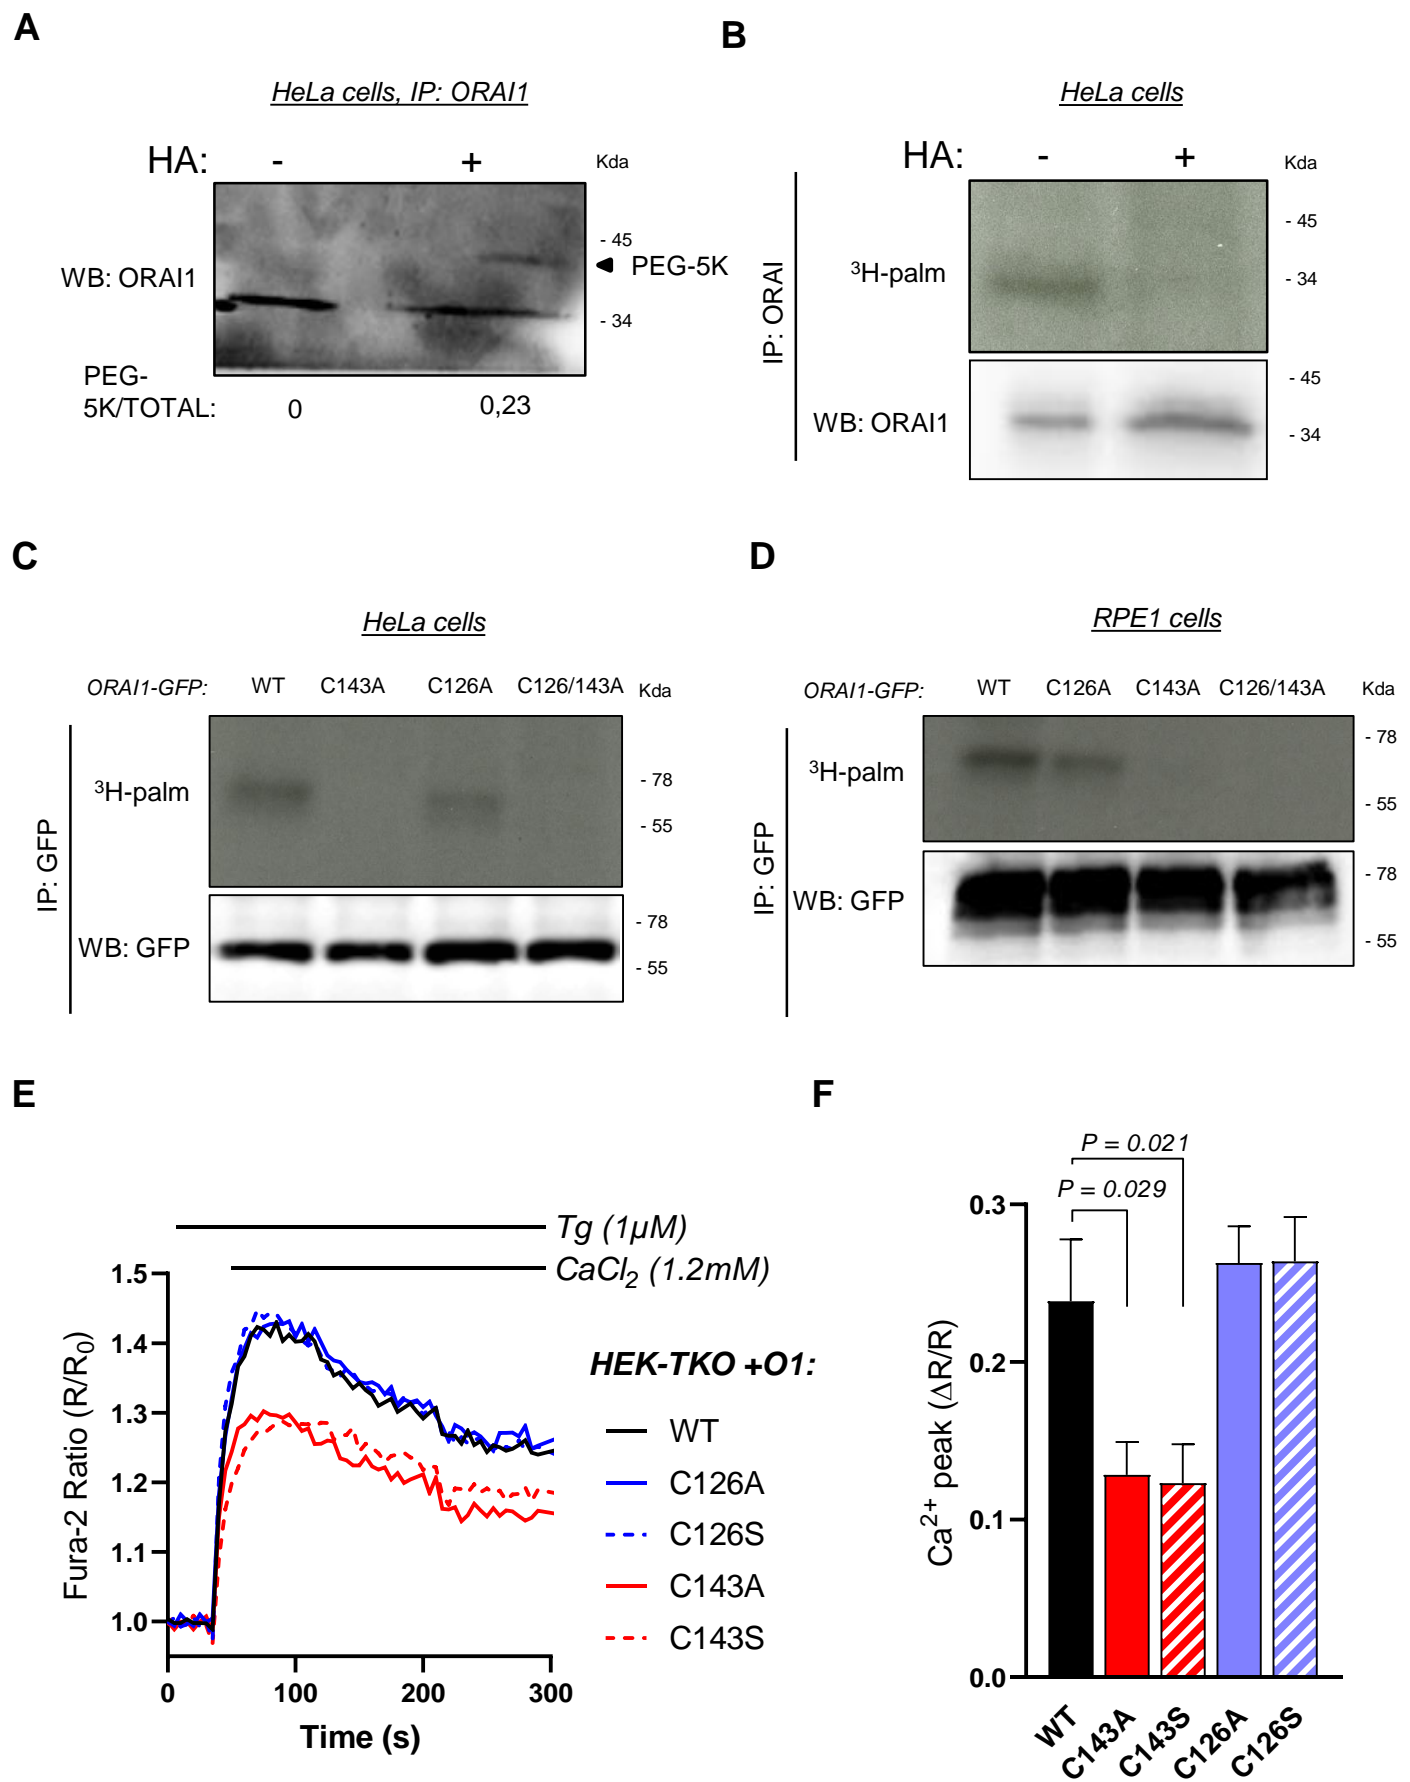

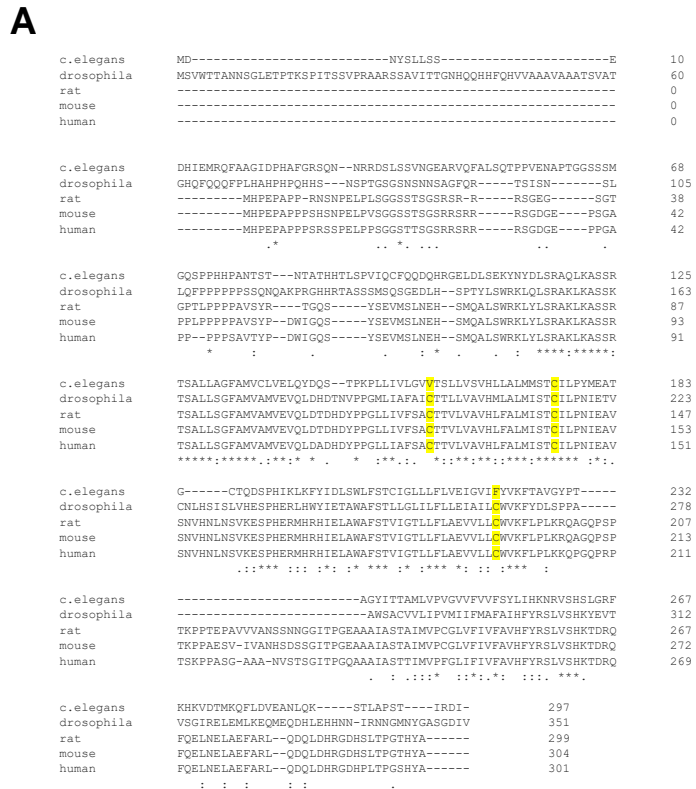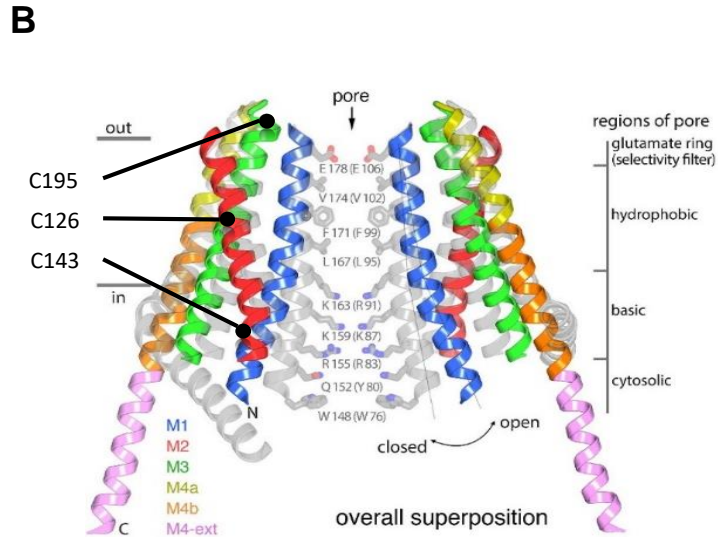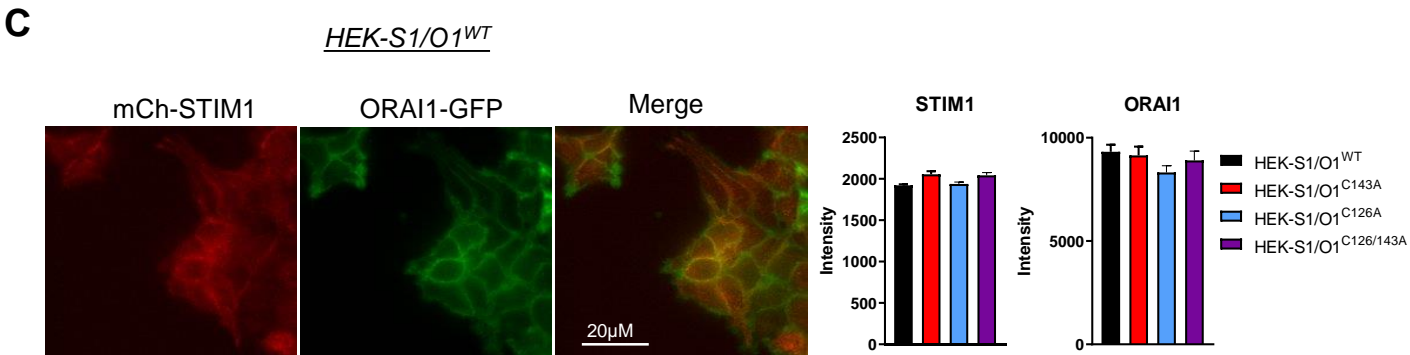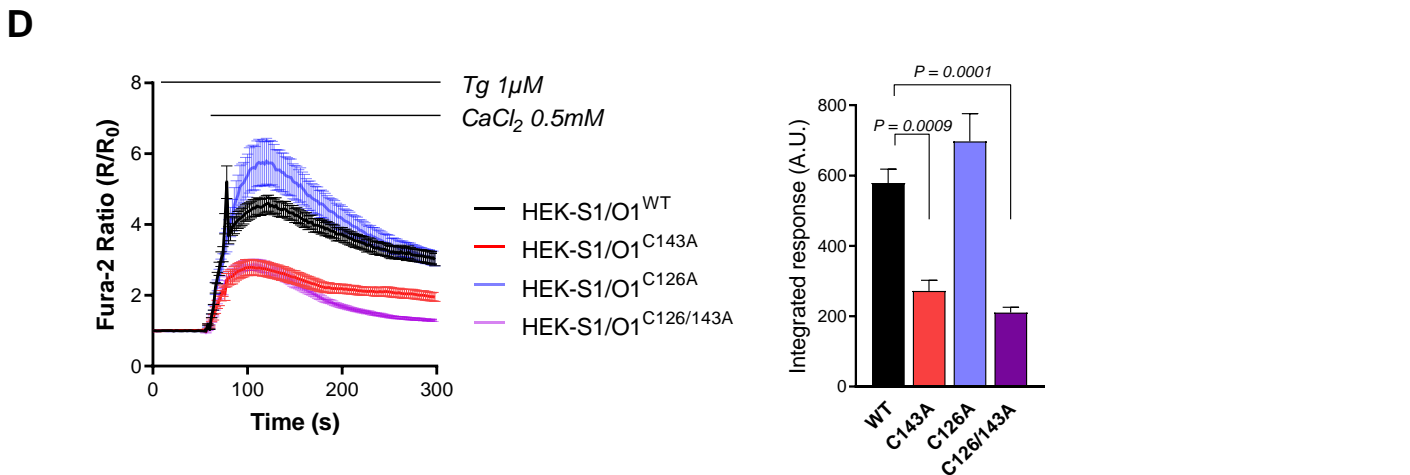



**A**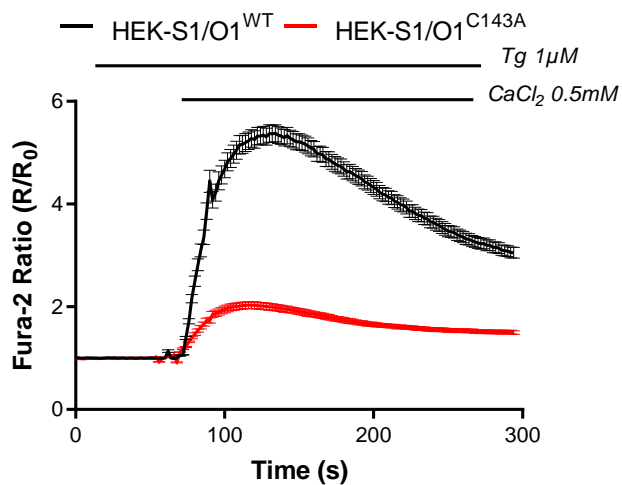**B**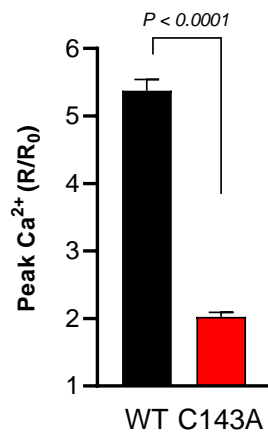**C**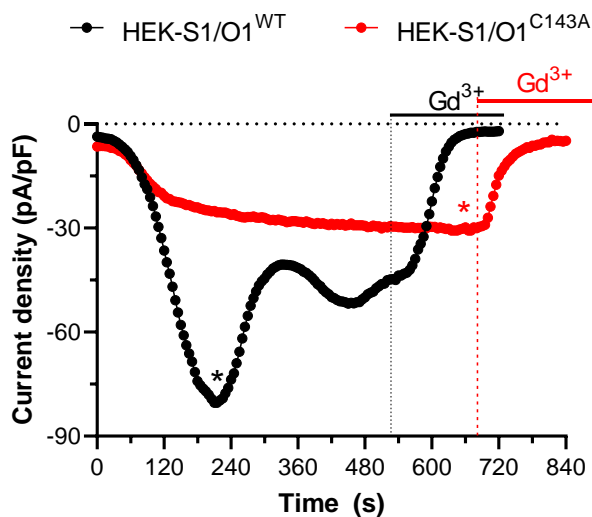**D**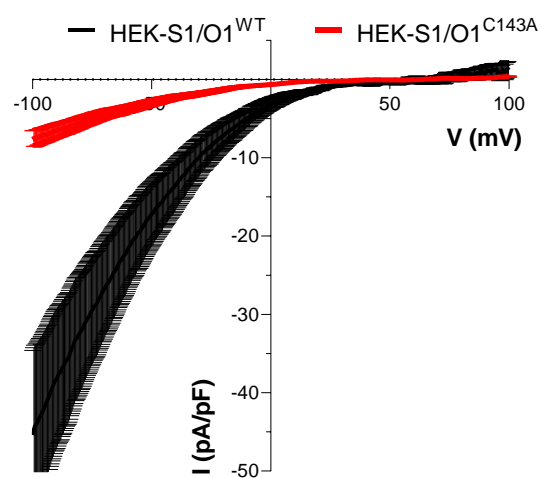**E**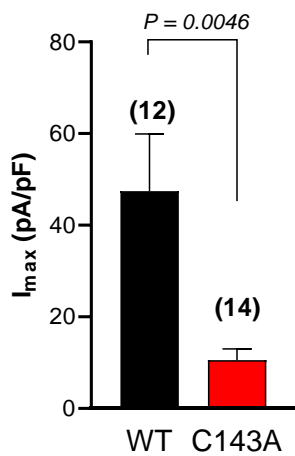**F**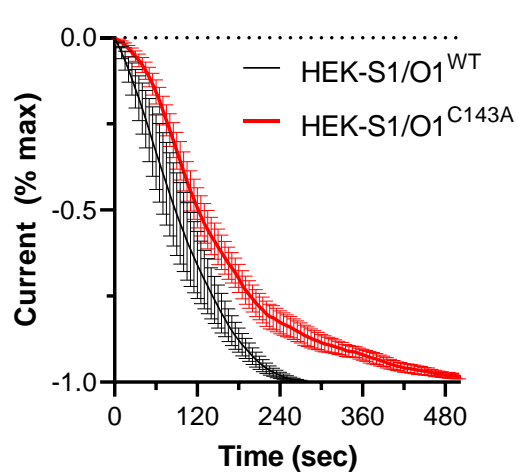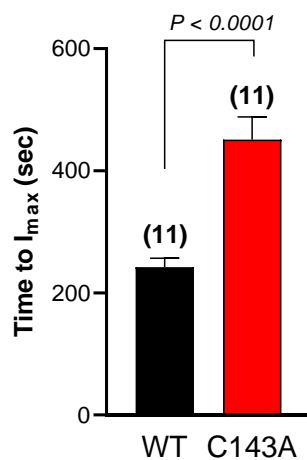



**A**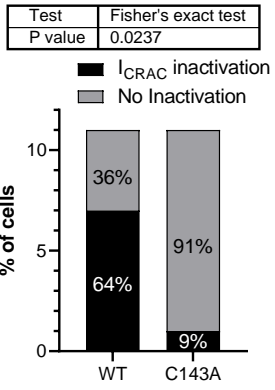

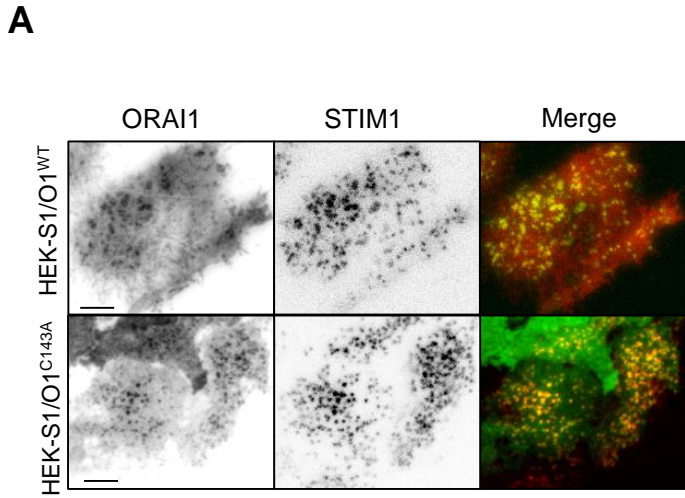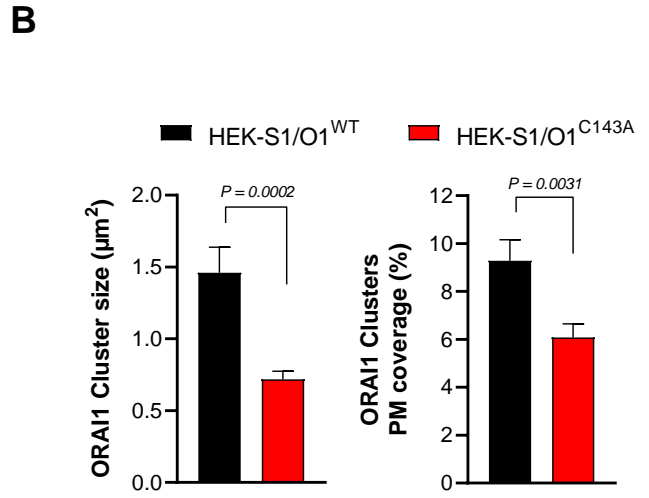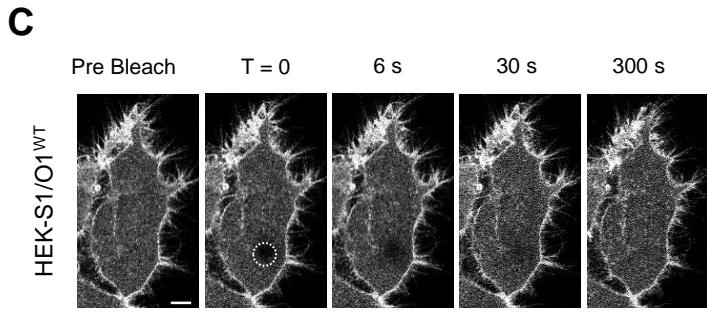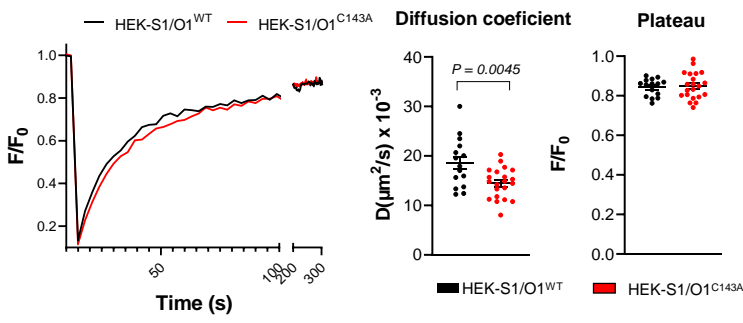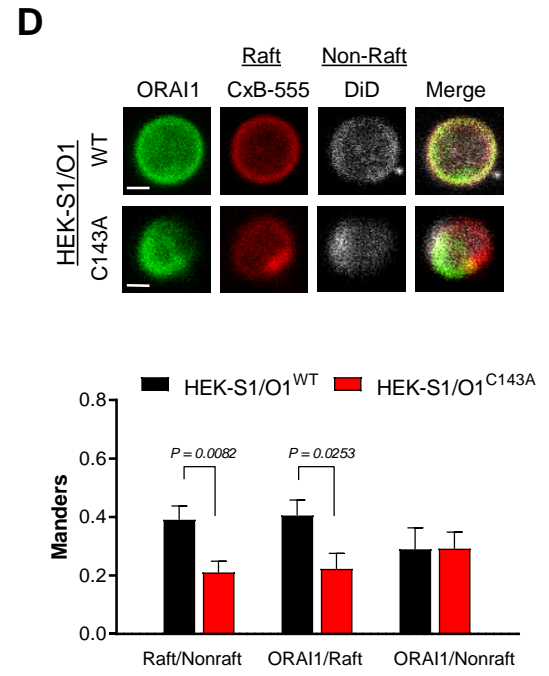

**A**

ORAI1 Parameters

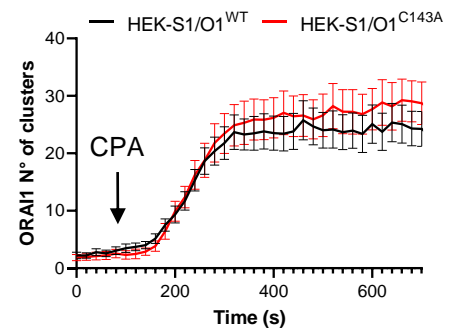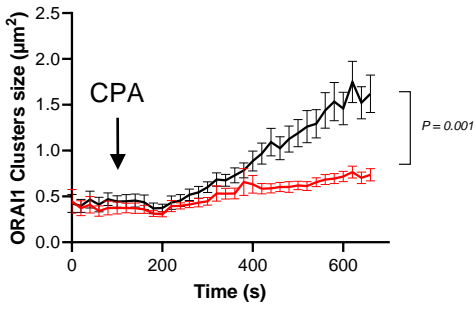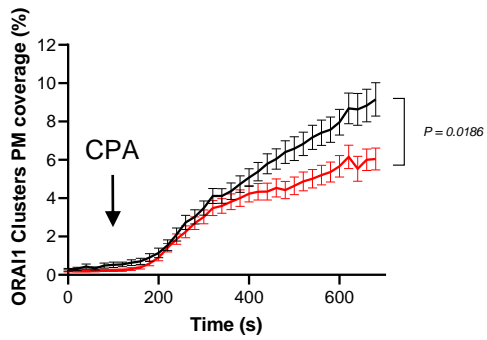

**B**

STIM1 Parameters

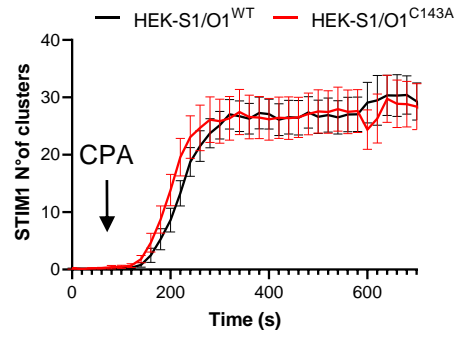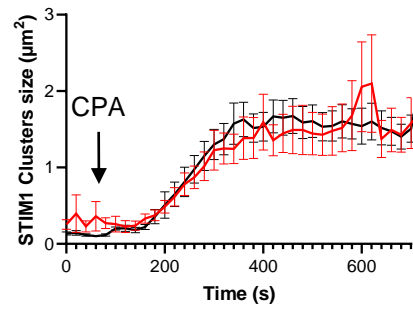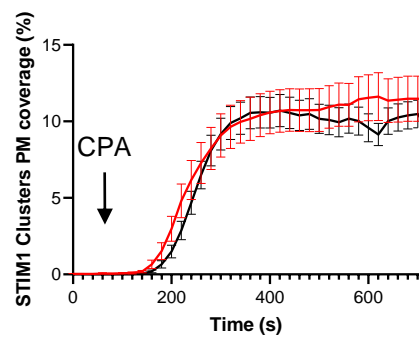

**A**

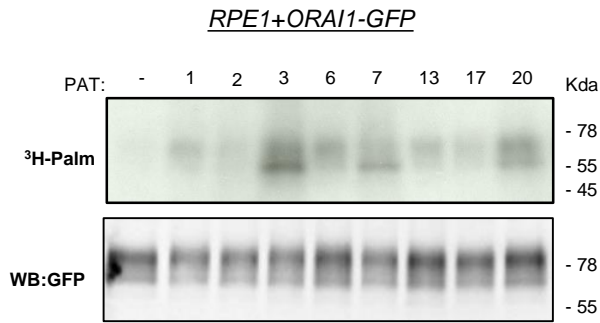

**B**

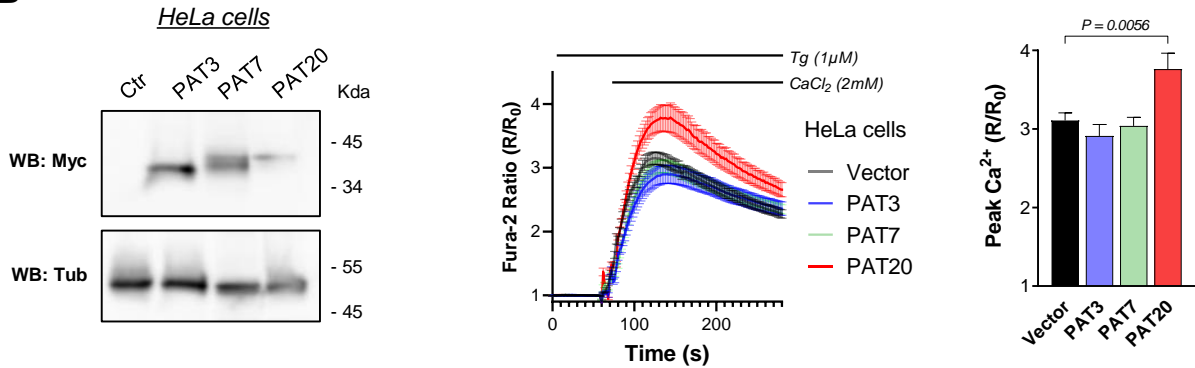

**C**

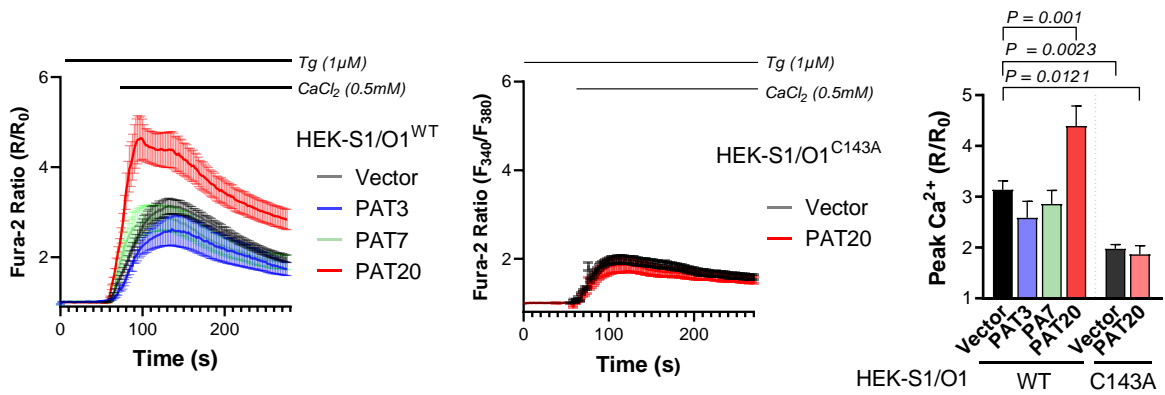

**D**

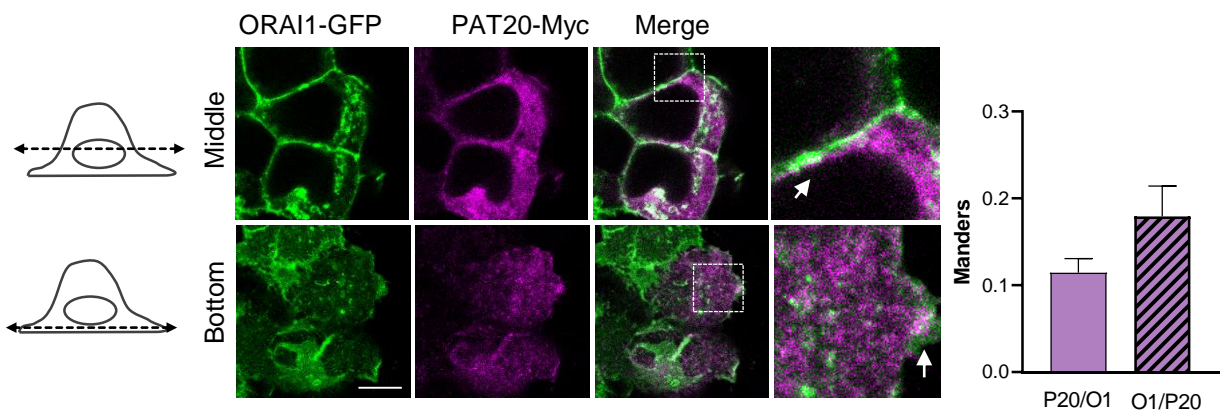

**A**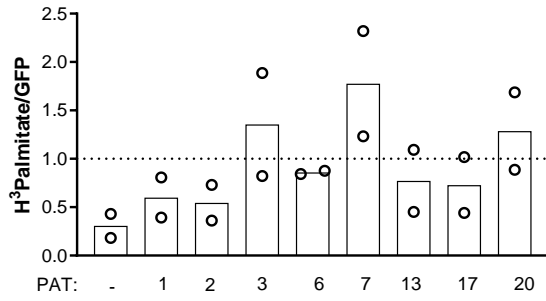**B**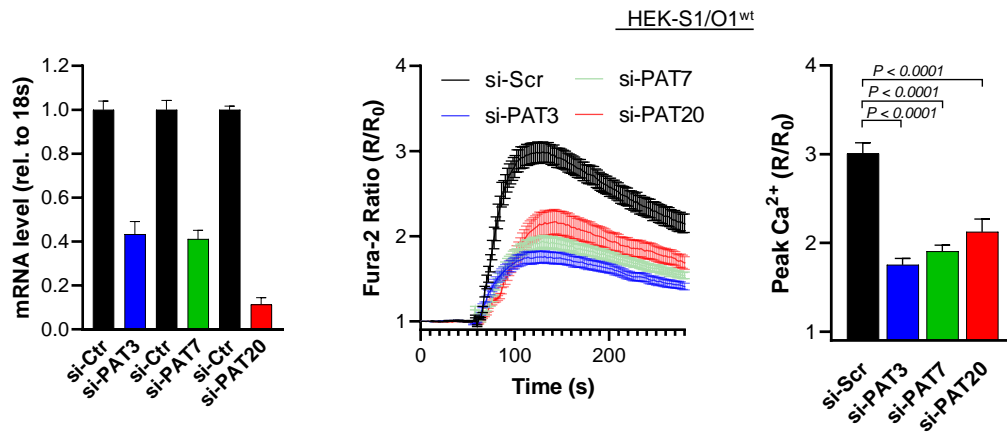

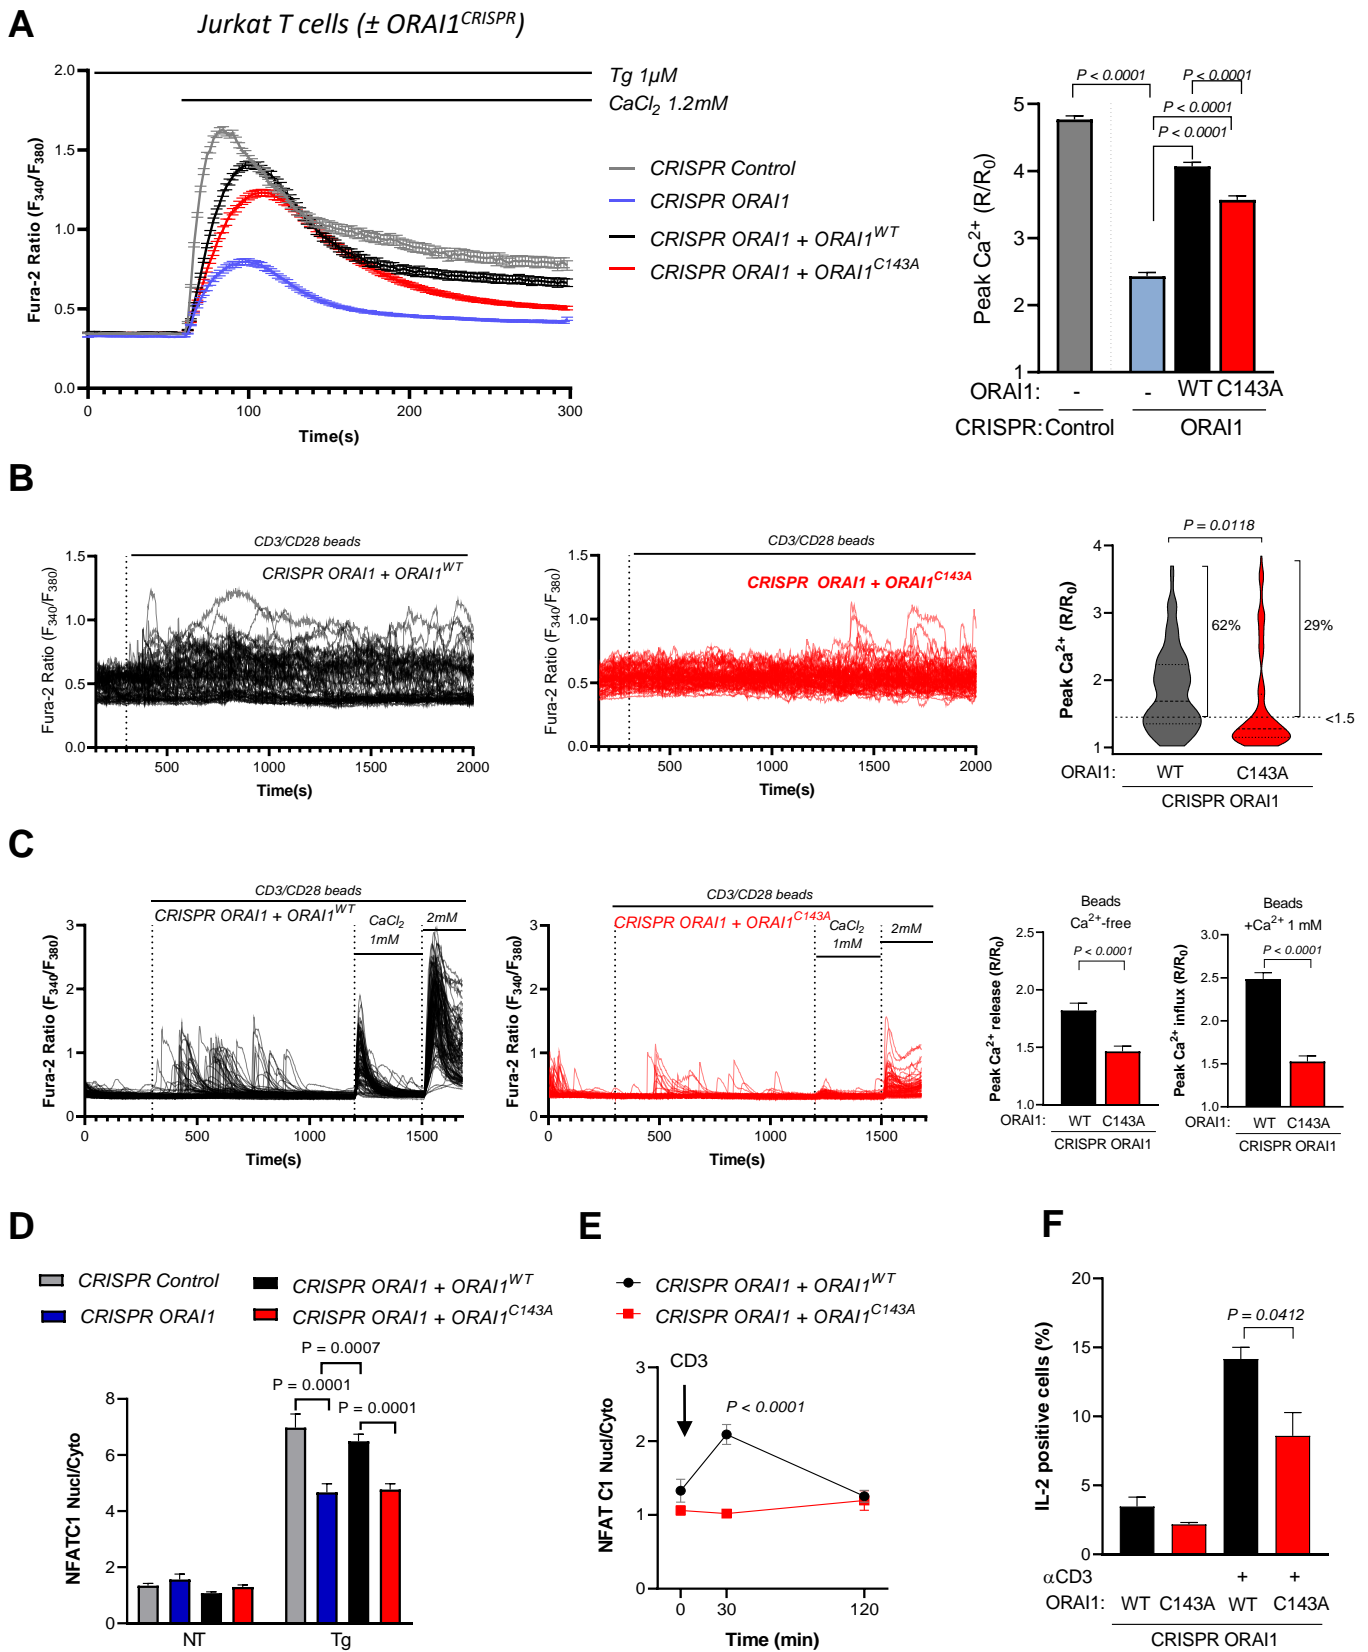

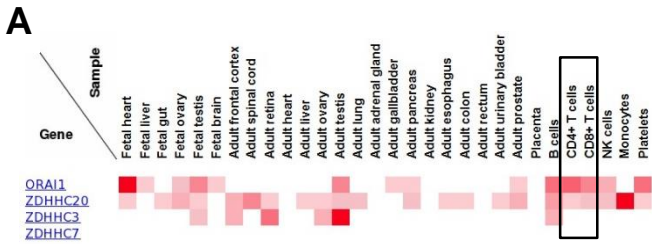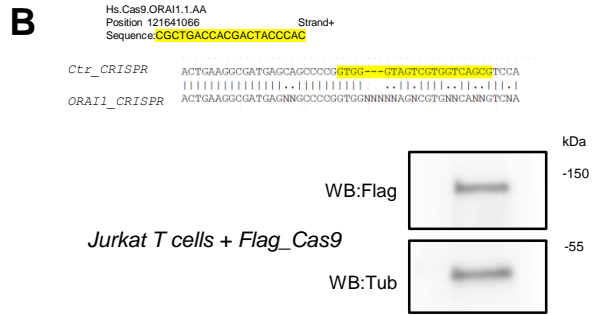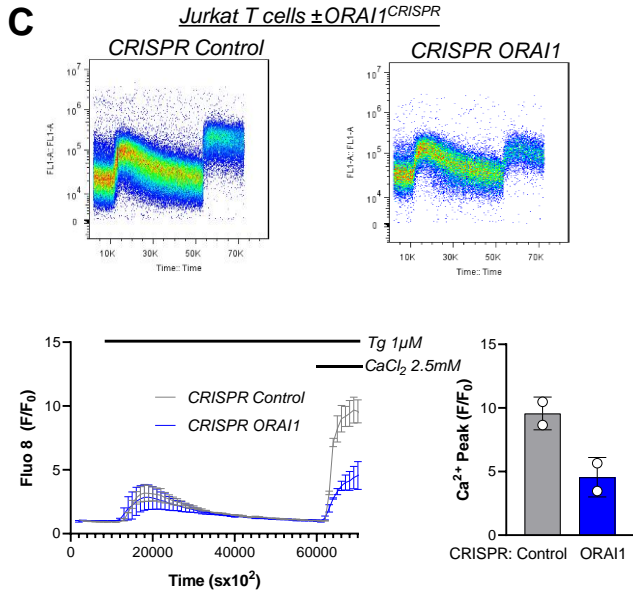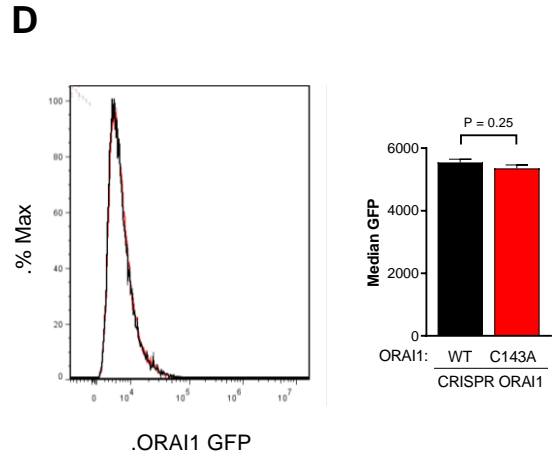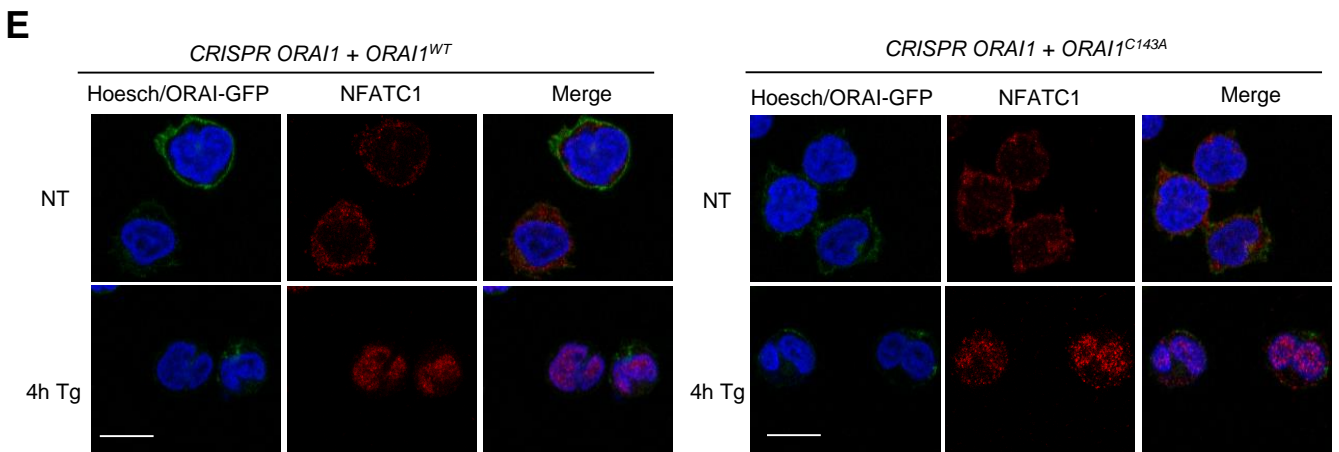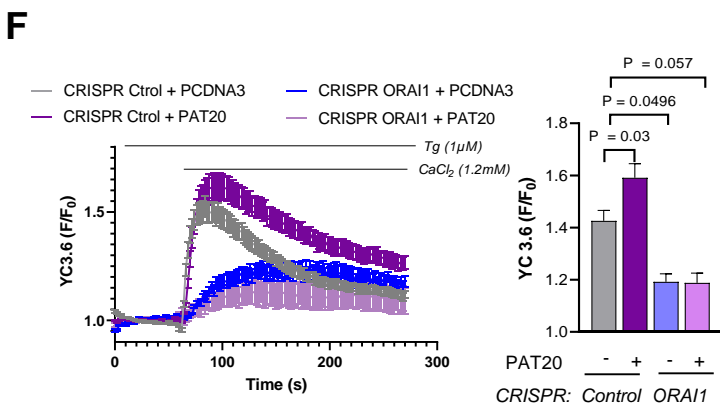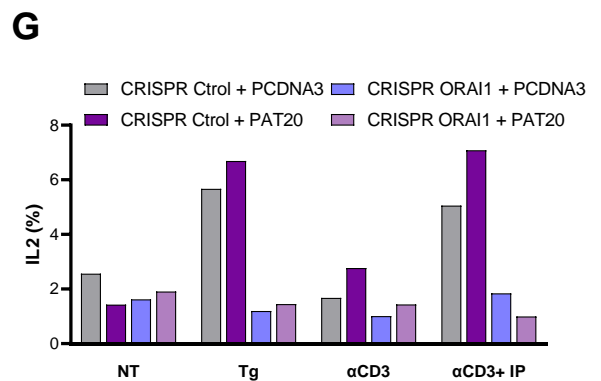



**A**

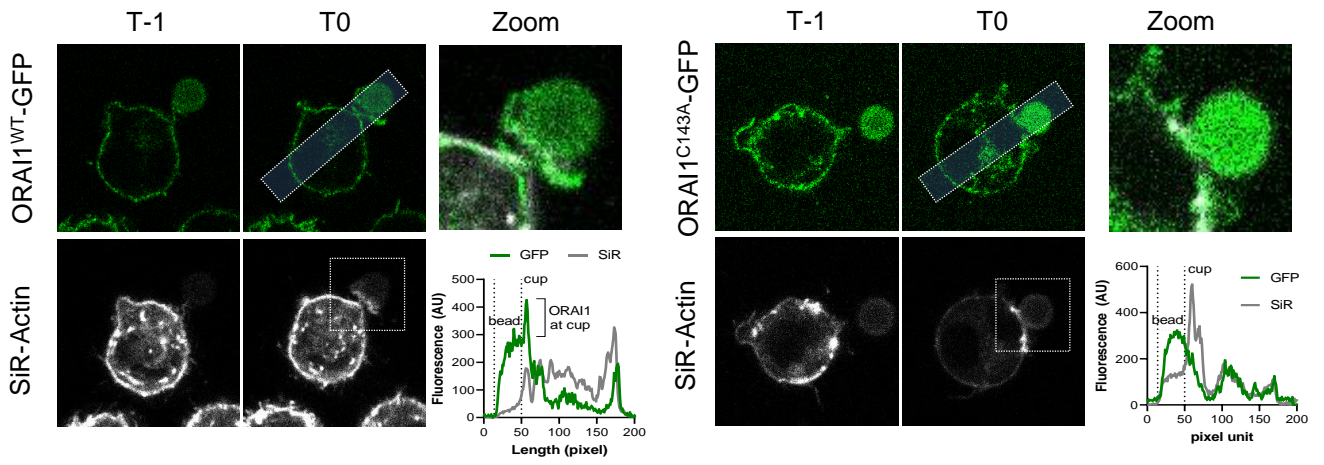

**B**

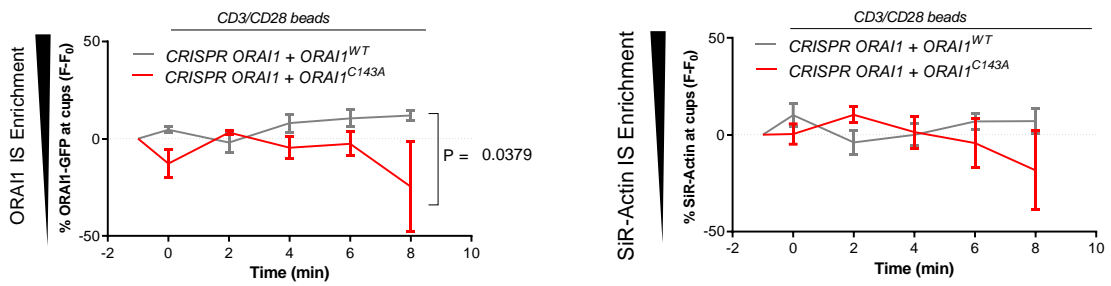

**C**

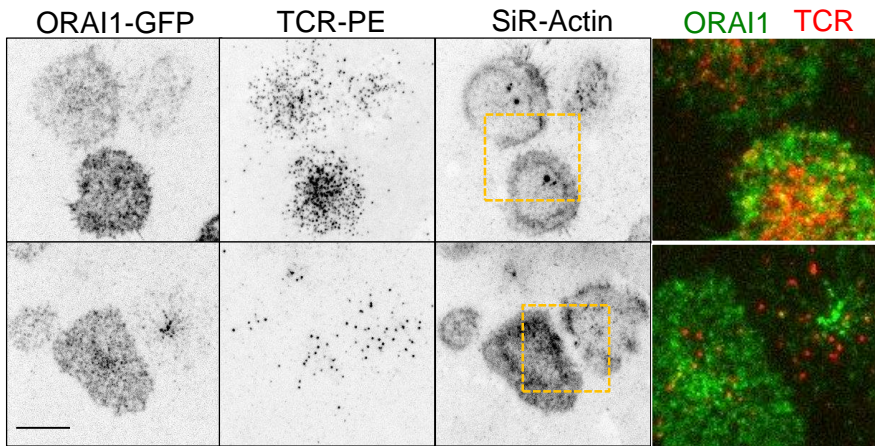

**D**

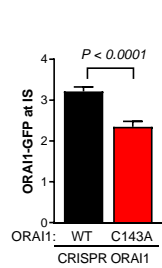

**E**

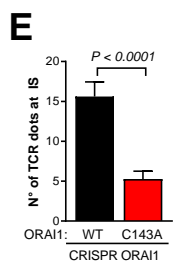

**F**

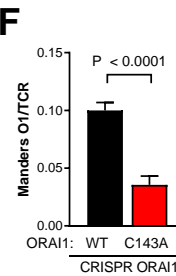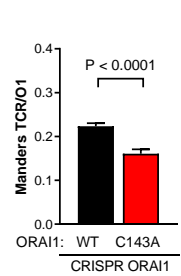

**G**

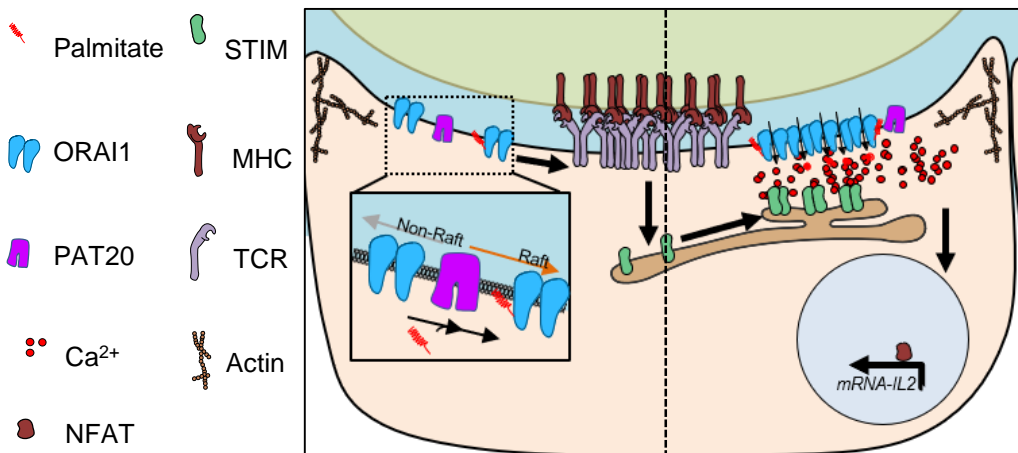

**H**

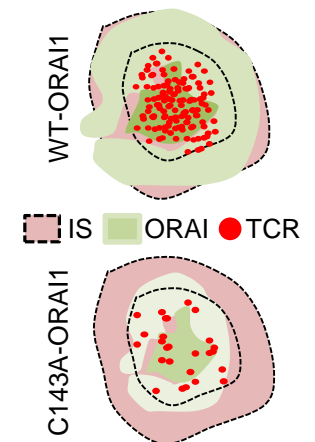



**A**

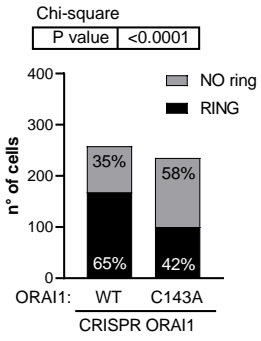

**B**

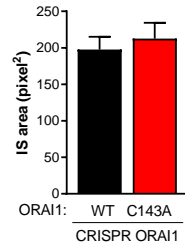

**C**

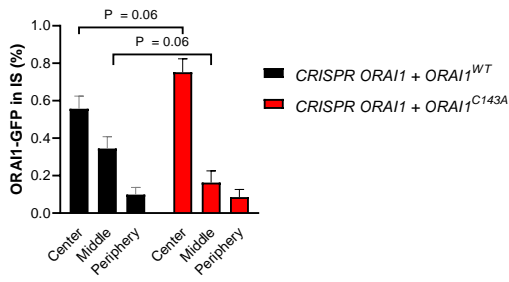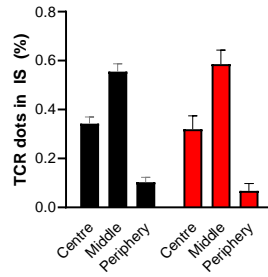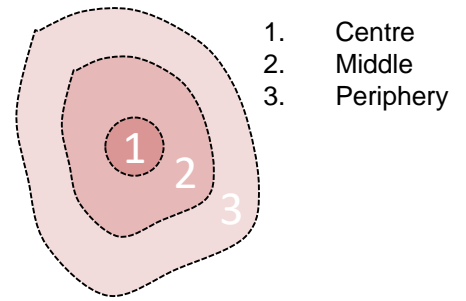

**D**

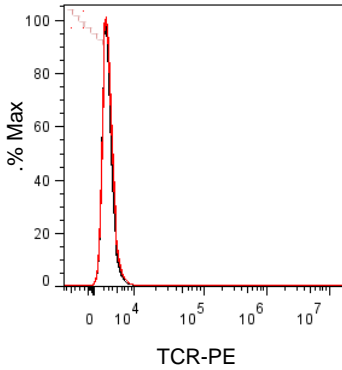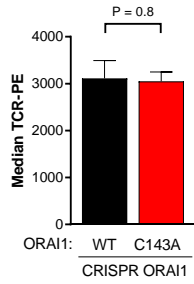

# FULL SCANS Figure 1, Carreras-Sureda et al.

**A**

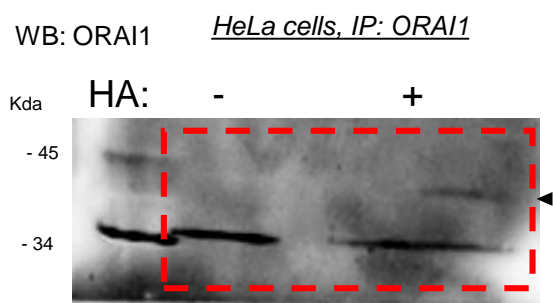

**B**

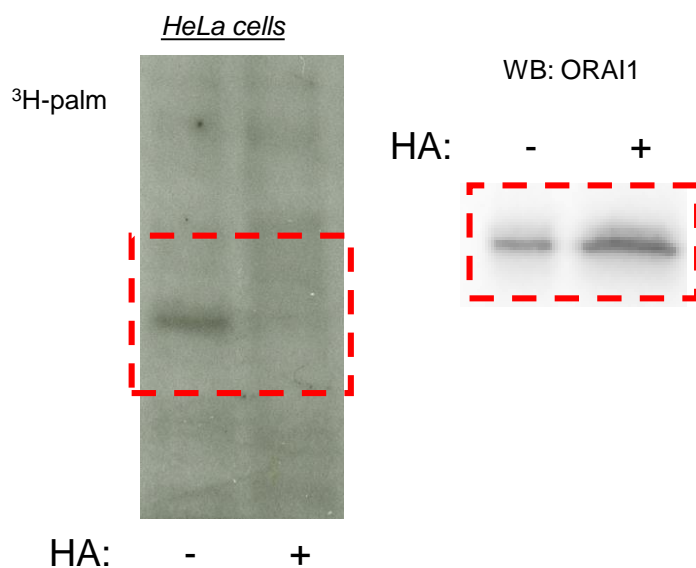

**C**

*HeLa cells*

ORAI1-GFP: WT C143A C126A C126/143A

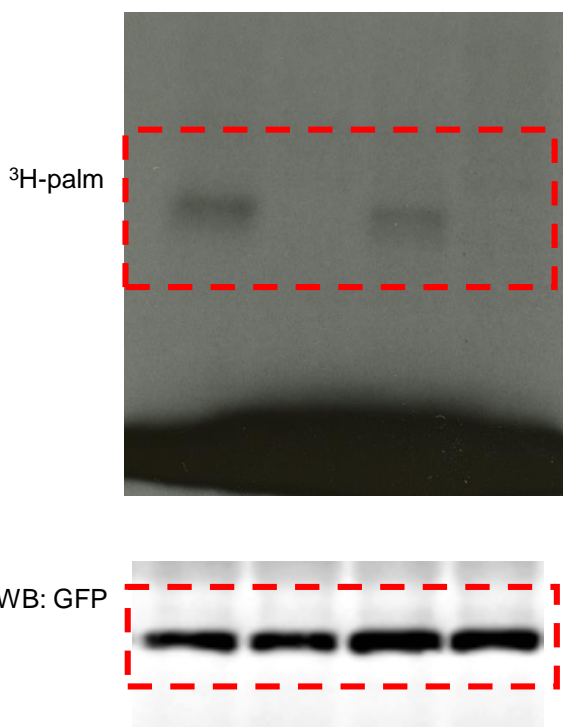

**D**

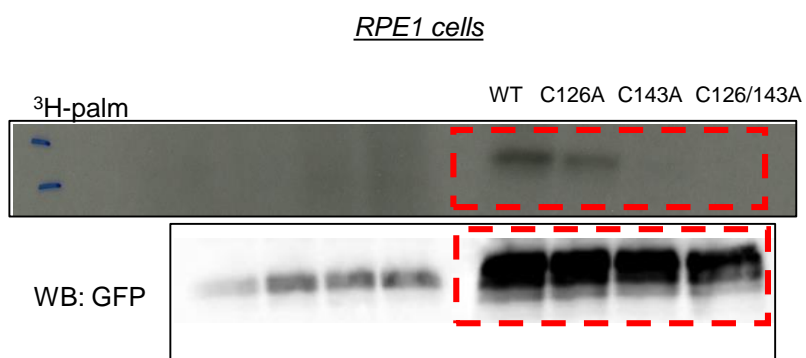

# FULL SCANS Figure 4, Carreras-Sureda et al.

**A**

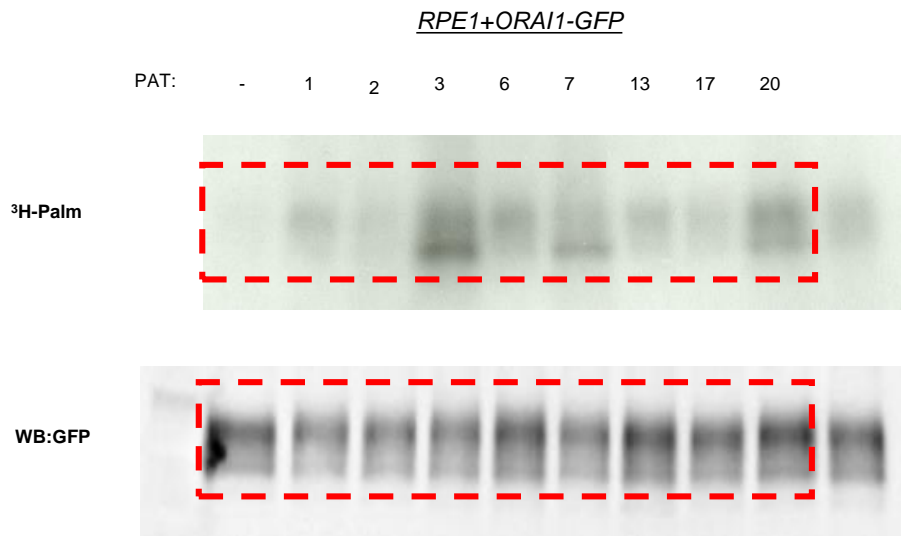

**B**

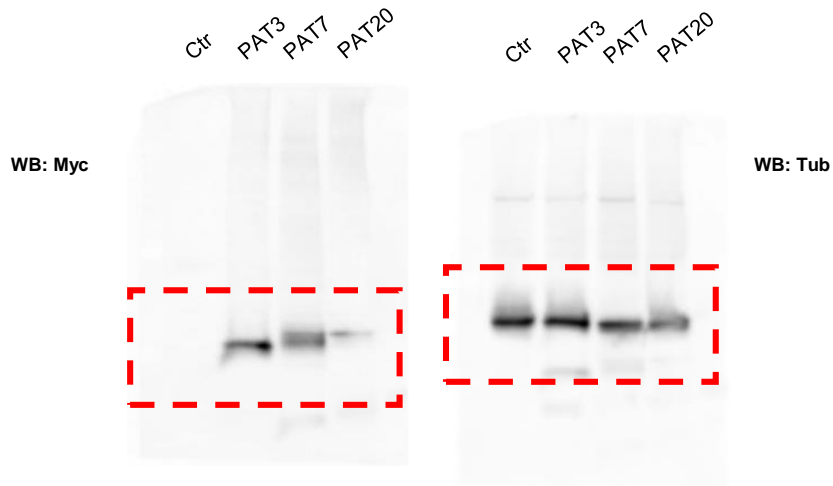

Source: https://www.biorxiv.org/content/biorxiv/early/2021/02/04/2021.02.03.429577.full.pdf
